# Supplementary material for: Nodding syndrome in Kitgum District, Uganda: association with conflict and internal displacement
Source: PubMed Central journal article supplement — BMJ Open. 2014 Nov 4;4(11):e006195. doi: 10.1136/bmjopen-2014-006195 (PMC4225239; doi:10.1136/bmjopen-2014-006195), 2014-11-04
Supplement: bmjopen-2014-006195.draft_revisions.pdf [file bmjopen-2014-006195.draft_revisions.pdf]

# BMJ Open

## Nodding Syndrome in Kitgum District, Uganda: Association with Conflict and Internal Displacement

|                                                                                                                                                                                                                               |                                                                                                                                                                                                                                          |
|-------------------------------------------------------------------------------------------------------------------------------------------------------------------------------------------------------------------------------|------------------------------------------------------------------------------------------------------------------------------------------------------------------------------------------------------------------------------------------|
| Journal:                                                                                                                                                                                                                      | <i>BMJ Open</i>                                                                                                                                                                                                                          |
| Manuscript ID:                                                                                                                                                                                                                | bmjopen-2014-006195                                                                                                                                                                                                                      |
| Article Type:                                                                                                                                                                                                                 | Research                                                                                                                                                                                                                                 |
| Date Submitted by the Author:                                                                                                                                                                                                 | 22-Jul-2014                                                                                                                                                                                                                              |
| Complete List of Authors:                                                                                                                                                                                                     | Landis, Jesa; Oregon Health and Science University, Global Health Center<br>Palmer, Valerie; Oregon Health and Science University, Global Health Center and Neurology<br>Spencer, Peter; Oregon Health and Science University, Neurology |
| <b>Primary Subject Heading</b>:                                                                                                                                                                                               | Neurology                                                                                                                                                                                                                                |
| Secondary Subject Heading:                                                                                                                                                                                                    | Neurology, Public health, Global health                                                                                                                                                                                                  |
| Keywords:                                                                                                                                                                                                                     | Epilepsy < NEUROLOGY, Paediatric neurology < PAEDIATRICS, Child & adolescent psychiatry < PSYCHIATRY, Internal Displacement, Food Insecurity, TOXICOLOGY                                                                                 |
| <p>Note: The following files were submitted by the author for peer review, but cannot be converted to PDF. You must view these files (e.g. movies) online.</p> <p>NS Uganda Fig.1<br/>NS Uganda Fig.2<br/>NS Uganda Fig.3</p> |                                                                                                                                                                                                                                          |

SCHOLARONE™  
Manuscripts

BMJ

1  
2  
3  
4  
5  
6  
7  
8 **Nodding Syndrome in Kitgum District, Uganda:**  
9 **Association with Conflict and Internal Displacement**  
10  
11  
12  
13  
14  
15

16 Jesa Landis<sup>1</sup>  
17 Valerie S. Palmer<sup>1,2</sup>  
18 Peter S. Spencer<sup>1,2</sup>  
19  
20  
21  
22  
23

24 <sup>1</sup>Global Health Center and <sup>2</sup>Department of Neurology, School of Medicine, Oregon  
25 Health & Science University, Portland, Oregon 97201  
26  
27  
28  
29  
30

31 **Corresponding Author:**

32 Dr. Peter S. Spencer  
33 Oregon Health & Science University  
34 3181 S.W. Sam Jackson Park Road, L356  
35 Portland, Oregon 97239  
36 Email: [spencer@ohsu.edu](mailto:spencer@ohsu.edu)  
37 Tel. 001-503-209-0986  
38  
39  
40  
41  
42

43 **Key Words:** Epilepsy, Conflict, Internal Displacement Camp, Food Insecurity  
44  
45  
46

47 **Word Count:** 1937 words  
48  
49  
50  
51  
52  
53  
54  
55  
56  
57  
58  
59  
60

## ABSTRACT

**Objectives.** To examine the temporal association of Nodding Syndrome with wartime conflict, casualties and household displacement in Kitgum District, northern Uganda.

**Methods.** Data were obtained from publicly available information reported by the Ugandan Ministry of Health, the Armed Conflict Location & Event Data Project of the University of Sussex in the U.K., peer-reviewed publications in professional journals, and other sources.

**Results.** Reports of Nodding Syndrome began to appear in 1997, with the first recorded cases in Kitgum District in 1998. Cases rapidly increased annually beginning in 2001, with peaks in 2003-5 and 2008, 4-6 years after peaks in the number of wartime conflicts and fatalities. Additionally, peaks of Nodding Syndrome cases followed peak influxes 5-7 years earlier of households into Internal Displacement Camps.

**Conclusion.** Nodding Syndrome is temporally associated with wartime conflicts, fatalities, and particularly with household internment, where infectious disease rates were high and food insecurity rife.

### Strengths and Limitations of this Study

- Diagnostic accuracy of Nodding Syndrome probably very high because of distinctive clinical signs.
- Study focused on a localized area with a very high prevalence (12/1000) of children with Nodding Syndrome, as reported by the U.S. Centers for Disease Control [7].
- Uncertainty regarding the accuracy of governmental and non-governmental reports of the number of fatalities, displaced persons, and Nodding Syndrome cases.

## INTRODUCTION

Nodding Syndrome (NS) is a treatable, but otherwise progressive, childhood seizure disorder of probable environmental origin. Epidemics of this form of epilepsy have occurred in certain East African populations subject to civil disruption, internal displacement, food insecurity, malnutrition, and nematode infection [1]. The apparent temporal association of an epidemic of NS (approximately 1998-2011) in northern Uganda and a civil war (1986-2006/8) between government forces and the Lord's Resistance Army (LRA), in which physical and psychological abuse and childhood abduction were rampant [2], has raised the possibility that wartime-related activities, as well as poverty and poor nutrition, are culpable [3,4]. Many war-traumatized children with NS are reported to suffer from Developmental Trauma Disorder, a form of post-traumatic stress disorder with severe and prolonged depression, psychomotor retardation, fear and anxiety [5]. Wartime activities reportedly included the use of land mines and unspecified prohibited chemical weapons delivered by Ugandan Army helicopters in 2002-3 [6]. Exposure to munitions emerged as a significant association with NS in Uganda [7] but no evidence for exposure to warfare chemicals was found during an earlier investigation of a NS epidemic in South Sudan [8]. A detailed analysis of possible etiologies associated with the epidemic highlighted neurotoxins in plant materials used for food [9].

Kitgum District in the Achoili Sub-Region of northern Uganda has been one of the areas most heavily impacted by both conflict and NS, with a prevalence of 1305 cases/100,000 in Labongo Akwang sub-county [3]. Here, we examine the temporal association of NS with wartime conflict, casualties and household displacement in Kitgum District (Figure 1). We find a delayed temporal association between peaks in conflict events and fatalities. Nodding Syndrome also correlates with household displacement and prolonged residence in camps for internally displaced people (IDP), where residents were heavily dependent on food aid [10]. The camps were insecure, unsanitary and squalid, and morbidity and mortality rates were high [11]. Starting in the mid-1990s, these camps were established by the government of Uganda with the goal of protecting people from the LRA, including an estimated 285,000 from Kitgum District [12].

## METHODS

The total number of NS cases in Kitgum District for the years 1998-2010 was obtained from the Ugandan Ministry of Health [MOH 2011, cited in 5]. Conflict events and fatalities in Kitgum District were derived from data obtained from the Armed Conflict Location & Event Data Project (ACLED) [13]. This comprehensive dataset contains information from 1997 on the specific dates and locations of political violence, the types of event, the groups involved, fatalities, and changes in territorial control of developing states, including Uganda. Information is recorded on the battles, killings, riots, and recruitment activities of rebels, governments, militias, armed groups, protesters and civilians. ACLED recorded over 80,000 individual events through early 2014, with ongoing data collection focused on Africa. Information on the relocation of households to IDP camps was obtained from the United Nations High Commission for Refugees [14]. Other data were taken from peer-reviewed and other publicly available documents.

## RESULTS

Between the years 1997 and 2011, the period during which data are available, peaks in both conflict events and fatalities arise in 1998, 2000, and 2003 (Figure 2). Reports of NS in northern Uganda began to appear in 1997, with the first recorded cases in Kitgum in 1998 [15] (Table 1). Cases rapidly increased annually beginning in 2001, with peaks in 2004 (2003-5) and 2008, followed by a decline toward present-day baseline levels. The 2003-05 and 2008 peaks of NS cases appeared 5-6 years respectively after the 1998 and 2000 conflict casualty peaks. Similarly, the 2000 and 2003 fatality peaks were followed 4-5 years later by peaks in NS cases.

Conflict in northern Uganda resulted in the relocation of the vast majority of the Acholi population to IDP camps. Figure 3 shows that relocation to IDP camps started slowly, increased markedly after a LRA massacre in January 1997, and slowly increased over subsequent years, with the highest peak in 2003 (the year of peak fatalities) before declining progressively thereafter. Nodding Syndrome cases appeared in 1998 and peaked in 2004 and 2008, 7 and 5 years respectively after the peak influxes of households into the IDP camps. Of some 1.1 million IDPs in Acholi region, >63% remained in camps in 2005 because of local insecurities. As of the end of June 2007, 539,550 IDPs had returned to their homes and some 916,000 IDPs remained in the camps. Another 381,000 moved to new sites closer to their homes [14].

**Table 1.** Annual events, fatalities and approximate number of new Nodding Syndrome cases. Compilation of data from Uganda Ministry of Health, September 2011 [originally cited in 13<sup>1</sup> and 5<sup>2</sup>].

| Year | Events <sup>1</sup> | Fatalities <sup>1</sup> | New NS Cases <sup>2</sup> |
|------|---------------------|-------------------------|---------------------------|
| 1997 | 22                  | 128                     |                           |
| 1998 | 57                  | 143                     | 3                         |
| 1999 | 13                  | 31                      | 2                         |
| 2000 | 19                  | 70                      | 5                         |
| 2001 | 8                   | 0                       | 4                         |
| 2002 | 42                  | 115                     | 25                        |
| 2003 | 53                  | 167                     | 38                        |
| 2004 | 33                  | 87                      | 42                        |
| 2005 | 21                  | 55                      | 36                        |
| 2006 | 8                   | 45                      | 52                        |
| 2007 | 2                   | 0                       | 70                        |
| 2008 | 1                   | 10                      | 82                        |
| 2009 | 0                   | 0                       | 62                        |
| 2010 | 0                   | 0                       | 46                        |
| 2011 | 1                   | 0                       |                           |

In Kitgum District, the first case of displacement took place in 1997, but the situation turned particularly bad between 2001 and 2002. Following the Uganda People's Defence Force's pursuit of the LRA into southern Sudan, there was a major escalation of LRA activity in northern Uganda. After the start of Operation Iron Fist in September 2002, a government operation aimed at crushing the LRA, almost the entire rural population (~1.3 million) of Gulu, Kitgum and Pader was forced to move to IDP camps. Conditions were described as appalling [15]. After the conflict had subsided, a sample of 210 households in Kitgum District showed that only 4.3% had not been displaced, 60% were planning to return to their homes directly, 21.4% through an intermediary location (satellite camps), and 14.3% were not planning to return to their home village [12].

## CONCLUSION

We show a possible relationship between the annual incidence of Nodding Syndrome and the annual number of conflict incidents and fatalities in preceding years. This supports an association between NS and wartime activities [3,4,7]. If the association is true, there is a latent period of approximately 5 years between the peak incidences of conflict/fatalities and NS cases, a disease that affects children tightly clustered around the ages of 5-15 years of age [1]. However, the war was in full flight in Acholi Sub-Region when the first reports of NS appeared in 1998, with thousands of residents fleeing villages in Gulu District in July 1996 after a wave of LRA violence. Cases of NS declined since 2008 in line with the cessation of the war and signing of a peace agreement between the Ugandan government and LRA in February 2008.

There are numerous reasons why conflict theoretically could be associated with NS. Exposure to warfare chemicals is readily posited but dismissed as highly improbable given the known neurotoxic properties of such substances, none of which causes repetitive head nodding from atonic seizures, let alone a progressive seizure disorder. Sudanese communities affected heavily by NS also experienced war and displacement but reported no symptoms consistent with neurotoxic exposures when questioned in 2002 [9]. Moreover, Tanzanian children with signs consistent with NS acquired the brain disease in the absence of war or civil conflict [16]. Severe psychological trauma resulting from the sight of injury and death, and the personal fear associated therewith, have also been advanced as casual of "Psychological NS" but populations in other war zones have not succumbed to a comparable illness. Furthermore, there are no reports of NS among the thousands of children who were abducted by the LRA and forced to conduct atrocities. Documentation is available of incidents described as "human rights abuses by the LRA" and "human rights violations by Ugandan Government forces" [2,6].

There is also an apparent relationship between the peaks of NS cases in Kitgum District and earlier peak influxes of households into IDP camps. The 1997 peak influx is followed 7 years later by elevated new NS cases in 2004 (2003-5), and the 2003 large influx of households anticipates a larger peak in new NS cases 5 years later in 2008. Conditions in the IDP camps were exceptionally poor, with overcrowding, violence, food insecurity, and high potential for disease transmission. In 2005, a government survey of Kitgum estimated an IDP population of 310,111 persons, 21% of whom was under 5

1  
2  
3 years of age. At the time of the survey, over 66% of children were reported to have been  
4 ill sometime in the previous 2 weeks. Crude mortality rates were ~2 deaths per 10,000  
5 per day and double that rate for children under the age of 5 years. Top self-reported  
6 causes of death in IDP camps were malaria/fever (34.7%), AIDS (15.1%) and violence  
7 (10.5%). An estimated 1216 persons were killed and an additional 304 (mostly children)  
8 abducted during the first half of 2005. Water was obtained from protected sources but  
9 water intake was low and waiting times high. Infant feeding practices were poor and, for  
10 children under the age of 5 years, the traditional disease concept of *two lango* or *gimiru*,  
11 a combination of oral thrush, malnutrition and diarrhea, was the second most commonly  
12 reported cause of death [17]. The World Food Programme provided food because ability  
13 to grow crops was limited due to security concerns [12]. Food quality was often  
14 extremely poor and, under normal conditions, would have been considered inedible. In  
15 some cases, security was so weak that food deliveries did not occur, with resulting  
16 hunger and malnutrition. Insecurity in IDP camps led to a migration of children (night  
17 commuters) to seek shelter in Kitgum hospitals, schools, municipal buildings, verandahs,  
18 parking lots and other open spaces [18]. Unfortunately, there are no data on the  
19 incidence of NS among night commuters.  
20  
21  
22  
23  
24  
25  
26  
27  
28  
29  
30  
31

32 The major limitation of this study is the accuracy of reports of the number of fatalities,  
33 displaced persons, and NS cases. Cited data are drawn from reports prepared by the  
34 Uganda Ministry of Health, international bodies, non-profit and other organizations.  
35 Reason for caution is illustrated by the report of a massacre on January, 7-12, 1997  
36 when “up to 412 civilians were killed by armed attackers in northwest Kitgum  
37 subcounties of Lokung and Palabek and in nearby areas.” [6]. This contrasts with the  
38 report of 128 fatalities in Kitgum throughout 1997 recorded in the ACLED database [13].  
39 ACLED fatality data are derived conservatively from a variety of sources, including  
40 research publications and reports from humanitarian agencies and local media. If a  
41 report mentions hundreds of fatalities, ACLED records the number as ‘one hundred’,  
42 which might explain the discrepancy.  
43  
44  
45  
46  
47  
48  
49  
50  
51

52 Taken in concert, there appears to be a reasonable correlation between IDP camp  
53 intake peaks and delayed NS peaks, which in turn show correspondence with prior  
54 conflict incidents and fatalities. Since the disease is clearly associated with prevailing  
55 environmental factors, but apparently not with polluted drinking water, suspicion falls  
56  
57  
58  
59  
60



1  
2  
3 heavily on food type, quality or spoilage. This meshes with findings from then-southern  
4 Sudan where NS was prevalent in sessile communities dependent on small gardens but  
5 absent in cattle herders, the latter having access to meat, blood and milk [9]. When  
6 questioned by investigators as to the source of their food, a strong association emerged  
7 between NS and use of garden food rather than food purchased from the market or  
8 provided by the World Food Program (U.S. Centers for Disease Control, unpublished  
9 data). Additionally, a link between food available in IDP camps and NS would explain the  
10 apparent absence of this brain disorder in abducted children: while they served as  
11 fighters, porters, sex slaves and baby-sitters, they likely had better access to food,  
12 including freshly killed human body parts.  
13  
14  
15  
16  
17  
18  
19  
20  
21  
22  
23  
24  
25  
26  
27  
28  
29  
30  
31  
32  
33  
34  
35  
36  
37  
38  
39  
40  
41  
42  
43  
44  
45  
46  
47  
48  
49  
50  
51  
52  
53  
54  
55  
56  
57  
58  
59  
60

**ACKNOWLEDGEMENTS**

This work was supported by the U.S. National Institute of Neurological Diseases & Stroke, grant number 1 R01 NS079276.

**Competing Interests:** None.

**Authors' Contributions**

All authors contributed to study design, data acquisition (principally J.L.) and data interpretation (principally P.S.S.) The paper was written by P.S.S. and edited by co-authors J.L. and V.S.P.

**Data Sharing Statement:** No additional data available

**REFERENCES**

1. Dowell SF, Sejvar JJ, Riek L, et al. Nodding Syndrome. *Emerg Infect Dis* 2013;19:1374-84.
2. Anon. *Abducted and Abused: Renewed Conflict in Northern Uganda*. Human Rights Watch 15, 12A, 2003. <http://www.hrw.org/sites/default/files/reports/uganda0703.pdf> (accessed July 2014).
3. Bukuluki P., Ddumba-Nyanzi I, Kisuule JD, et al. Nodding Syndrome in post-conflict northern Uganda: A human security perspective. *Global Hlth Govern* 6, 2012. <http://www.ghgj.org> (accessed 10 July 2014).
4. Kitara DL, Amone C. Perception of the population in Northern Uganda to nodding syndrome. *J Med Med Sci* 2012;3:464-70.
5. Musisi S, Akena D, Nakimulu-Mpungu E, et al. Neuropsychiatric perspectives on nodding syndrome in northern Uganda: a case series study and a review. *Afr Hlth Sci* 2013;13:205-18.
6. Mulindwa HE. *Detailed Atrocities Caused in the Acholi Sub Region*. 26 Feb, 2012. <https://www.mail-archive.com/ugandanet@kym.net/msg27528.html> (accessed 10 July, 2014)
7. Foltz JL, Makumbi I, Sejvar JJ, et al. An epidemiologic investigation of potential risk factors for Nodding Syndrome in Kitgum District, Uganda. *PLoS One* 2013;8:e66419.
8. Tumwine JK, Vandemaele K, Chungong S, et al. Clinical and epidemiologic characteristics of nodding syndrome in Mundri County, southern Sudan. *Afr Health Sci* 2012;12:242-8.

- 1  
2  
3 9. Spencer PS, Vandemaele K, Richer M, et al. Nodding syndrome in Mundri County,  
4 South Sudan: environmental, nutritional and infectious factors. *Afr Health Sci*  
5 2013;13:183-204.  
6  
7  
8  
9  
10 10. World Food Programme. *Emergency Food Security Assessment of IDP Camps in*  
11 *Gulu, Kitgum, Kira and Pader Districts, March-May 2005*. September, 2005.  
12 <http://documents.wfp.org/stellent/groups/public/documents/ena/wfp079422.pdf>  
13 (accessed 10 July 2014).  
14  
15  
16  
17  
18 11. Bozzoli C, Brzzo T. *Child Mortality and Camp Decongestion in Post-war Uganda*.  
19 Microcon Research Working Paper 24, Brighton, May 2010.  
20 [http://www.microconflict.eu/publications/RWP24\\_CB\\_TB.pdf](http://www.microconflict.eu/publications/RWP24_CB_TB.pdf) (accessed 10 July 2014).  
21  
22  
23  
24 12. World Food Programme. *Food Security Assessment of IDP Camps in Gulu, Kitgum,*  
25 *and Pader Districts, October 2006. Final Report*. January 2007.  
26 <http://documents.wfp.org/stellent/groups/public/documents/ena/wfp120444.pdf>  
27 (accessed 10 July 2014).  
28  
29  
30  
31  
32 13. Raleigh C, Linke A, HåvardH, Karlsen J. Introduced ACLED – Armed Conflict  
33 Location and Event Data. *J Peace Res* 2010;47:1-10. [www.acleddata.com](http://www.acleddata.com) (accessed 10  
34 July 2014).  
35  
36  
37  
38  
39 14. Russo R. *Uganda's IDP Camps Start to Close as Peace Takes Hold*. September 11,  
40 2007. <http://www.unhcr.org/46e6a68013.html> (accessed 10 July 2014).  
41  
42  
43  
44 15. Boas M, Hartley A. *Northern Uganda Internally Displaced Persons Profiling Study*.  
45 Vol 1, United Nations Development Programme. 2005.  
46 [http://www.fafo.no/ais/africa/uganda/IDP\\_uganda\\_2005.pdf](http://www.fafo.no/ais/africa/uganda/IDP_uganda_2005.pdf) (accessed 10 July 2014).  
47  
48  
49  
50 16. Spencer PS, Palmer VS, Jilek-Aall L. Nodding syndrome: origins and natural history  
51 of a longstanding epileptic disorder in sub-Saharan Africa. *Afr Health Sci* 2013;13:176-  
52 82, 2013.  
53  
54  
55  
56  
57  
58  
59  
60

1  
2  
3 17. Uganda Ministry of Health. *Health and Mortality Survey Among Internally Displaced*  
4 *Persons in Gulu, Kitgum and Pader Districts, Northern Uganda*. World Health  
5 Organization, Geneva, July, 2005.

6  
7  
8 <http://www.who.int/hac/crises/uga/sitreps/Ugandamortsurvey.pdf> (accessed 10 July  
9 2014).

10  
11  
12  
13 18. United Nations. *An Account of Life in Northern Uganda*. oOCHA RSO-CEA and IRIN,  
14 2004. <http://www.irinnews.org/pdf/in-depth/when-the-sun-sets-revised-edition.pdf>.  
15 (accessed 10 July 2014).  
16  
17  
18  
19  
20  
21  
22  
23  
24  
25  
26  
27  
28  
29  
30  
31  
32  
33

## 34 **FIGURE LEGENDS**

### 35 36 37 **Figure 1.**

38  
39 Kitgum District (*center*), northern Uganda, one of three districts heavily impacted by  
40 Nodding Syndrome  
41  
42

### 43 44 **Figure 2.**

45  
46 Temporal relationship between conflict events, fatalities and approximate number of new  
47 cases of Nodding Syndrome. Kitgum District, 1997-2011.  
48  
49

### 50 **Figure 3.**

51  
52 Temporal relationship between new cases of Nodding Syndrome relative to household  
53 relocation to IDP camps. Kitgum District, 2005 [18].  
54  
55  
56  
57  
58  
59  
60

1  
2  
3  
4  
5  
6  
7  
8  
9  
10  
11  
12  
13  
14  
15  
16  
17  
18  
19  
20  
21  
22  
23  
24  
25  
26  
27  
28  
29  
30  
31  
32  
33  
34  
35  
36  
37  
38  
39  
40  
41  
42  
43  
44  
45  
46  
47  
48  
49  
50  
51  
52  
53  
54  
55  
56  
57  
58  
59  
60

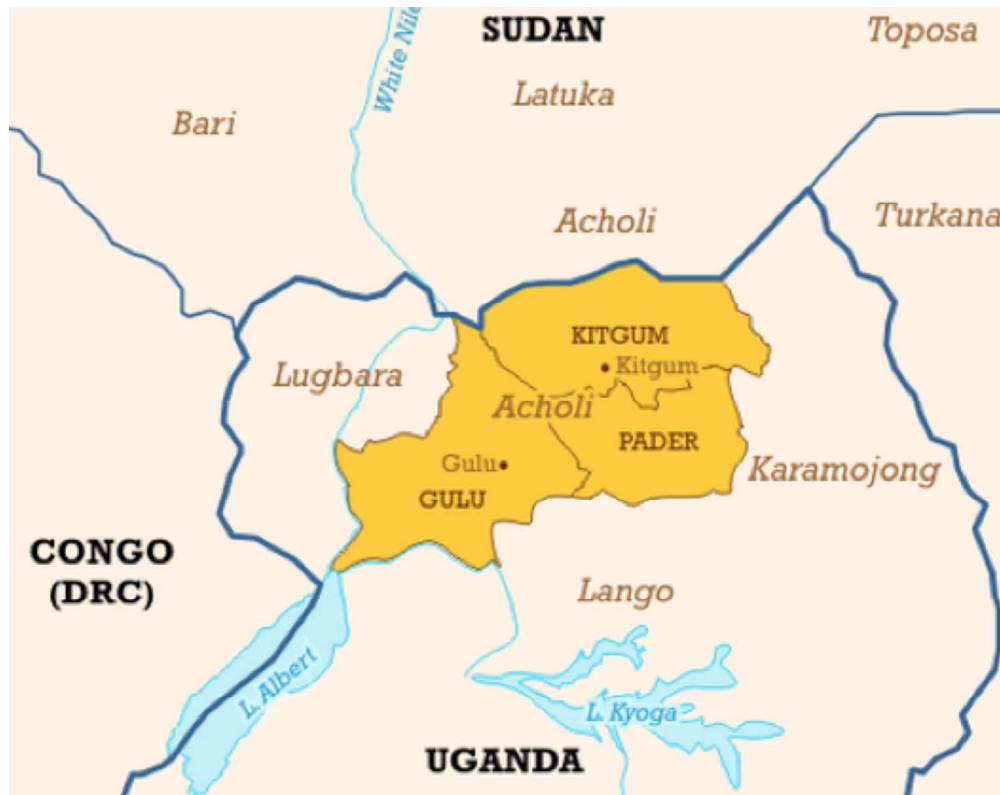

Kitgum District (center), northern Uganda, one of three districts heavily impacted by Nodding Syndrome

Review only

1  
2  
3  
4  
5  
6  
7  
8  
9  
10  
11  
12  
13  
14  
15  
16  
17  
18  
19  
20  
21  
22  
23  
24  
25  
26  
27  
28  
29  
30  
31  
32  
33  
34  
35  
36  
37  
38  
39  
40  
41  
42  
43  
44  
45  
46  
47  
48  
49  
50  
51  
52  
53  
54  
55  
56  
57  
58  
59  
60

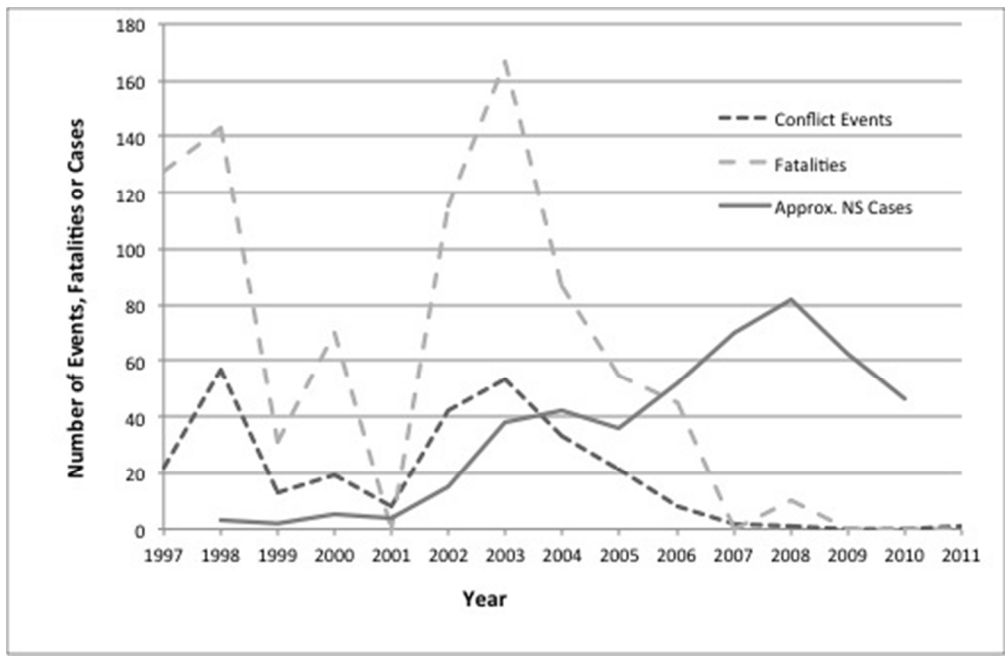

Temporal relationship between conflict events, fatalities and approximate number of new cases of Nodding Syndrome. Kitgum District, 1997-2011.  
180x117mm (72 x 72 DPI)

Review only

1  
2  
3  
4  
5  
6  
7  
8  
9  
10  
11  
12  
13  
14  
15  
16  
17  
18  
19  
20  
21  
22  
23  
24  
25  
26  
27  
28  
29  
30  
31  
32  
33  
34  
35  
36  
37  
38  
39  
40  
41  
42  
43  
44  
45  
46  
47  
48  
49  
50  
51  
52  
53  
54  
55  
56  
57  
58  
59  
60

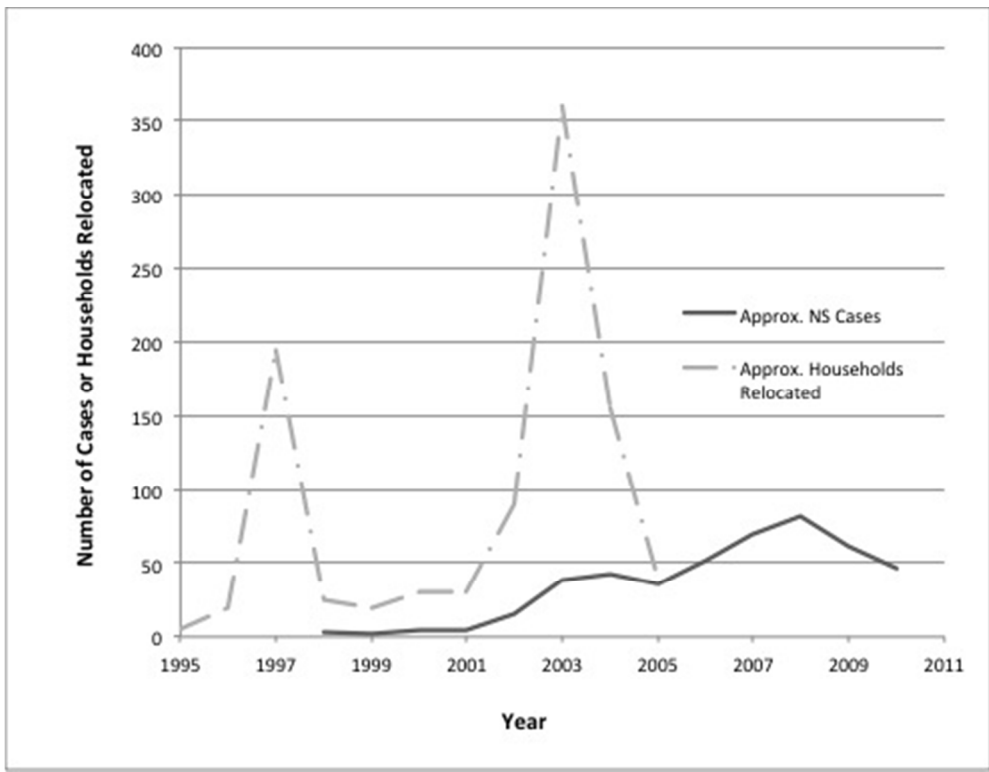

Temporal relationship between new cases of Nodding Syndrome relative to household relocation to IDP camps. Kitgum District, 2005 [18].  
174x134mm (72 x 72 DPI)

ew only



# BMJ Open

## Nodding Syndrome in Kitgum District, Uganda: Association with Conflict and Internal Displacement

|                                 |                                                                                                                                                                                                                                          |
|---------------------------------|------------------------------------------------------------------------------------------------------------------------------------------------------------------------------------------------------------------------------------------|
| Journal:                        | <i>BMJ Open</i>                                                                                                                                                                                                                          |
| Manuscript ID:                  | bmjopen-2014-006195.R1                                                                                                                                                                                                                   |
| Article Type:                   | Research                                                                                                                                                                                                                                 |
| Date Submitted by the Author:   | 23-Sep-2014                                                                                                                                                                                                                              |
| Complete List of Authors:       | Spencer, Peter; Oregon Health and Science University, Neurology<br>Landis, Jesa; Oregon Health and Science University, Global Health Center<br>Palmer, Valerie; Oregon Health and Science University, Global Health Center and Neurology |
| <b>Primary Subject Heading</b>: | Neurology                                                                                                                                                                                                                                |
| Secondary Subject Heading:      | Neurology, Public health, Global health                                                                                                                                                                                                  |
| Keywords:                       | Epilepsy < NEUROLOGY, Paediatric neurology < PAEDIATRICS, Child & adolescent psychiatry < PSYCHIATRY, Internal Displacement, Food Insecurity, TOXICOLOGY                                                                                 |
|                                 |                                                                                                                                                                                                                                          |

SCHOLARONE™  
Manuscripts

1  
2  
3  
4  
5  
6  
7  
8 **Nodding Syndrome in Kitgum District, Uganda:**  
9 **Association with Conflict and Internal Displacement**  
10  
11  
12  
13  
14

15  
16 Jesa L. Landis<sup>1</sup>  
17 Valerie S. Palmer<sup>1,2</sup>  
18 Peter S. Spencer<sup>1,2</sup>  
19  
20  
21  
22  
23

24 <sup>1</sup>Global Health Center and <sup>2</sup>Department of Neurology, School of Medicine, Oregon  
25 Health & Science University, Portland, Oregon 97201  
26  
27  
28  
29  
30

31 **Corresponding Author:**

32 Dr. Peter S. Spencer  
33 Oregon Health & Science University  
34 3181 S.W. Sam Jackson Park Road, L356  
35 Portland, Oregon 97239  
36 Email: [spencer@ohsu.edu](mailto:spencer@ohsu.edu)  
37 Tel. 001-503-209-0986  
38  
39  
40  
41  
42  
43

44 **Key Words:** Epilepsy, Conflict, Internal Displacement Camp, Food Insecurity  
45  
46  
47  
48  
49  
50  
51  
52  
53  
54  
55  
56  
57  
58  
59  
60

## ABSTRACT

**Objectives.** To test for any temporal association of Nodding Syndrome with wartime conflict, casualties and household displacement in Kitgum District, northern Uganda.

**Methods.** Data were obtained from publicly available information reported by the Ugandan Ministry of Health (MOH), the Armed Conflict Location & Event Data (ACLED) Project of the University of Sussex in the U.K., peer-reviewed publications in professional journals, and other sources.

**Results.** Reports of Nodding Syndrome began to appear in 1997, with the first recorded cases in Kitgum District in 1998. Cases rapidly increased annually beginning in 2001, with peaks in 2003-5 and 2008, 5-6 years after peaks in the number of wartime conflicts and fatalities. Additionally, peaks of Nodding Syndrome cases followed peak influxes 5-7 years earlier of households into Internal Displacement Camps.

**Conclusion.** Peaks of Nodding Syndrome reported by the MOH are associated with, but temporally displaced from, peaks of wartime conflicts, fatalities and household internment, where infectious disease was rampant and food insecurity rife.

### Strengths and Limitations of this Study

- While clinical signs (head nodding) of Nodding Syndrome are distinct and readily recognized, the diagnostic criteria used by a MOH between 1998-2011 appear to have overestimated case prevalence two-fold based on the current MOH-CDC case definition.
- This study focused on a localized area with a very high prevalence of children with probable Nodding Syndrome, as reported by the U.S. Centers for Disease Control (CDC) [7].
- Uncertainty regarding the accuracy of governmental and non-governmental reports of the number of fatalities, displaced persons, and Nodding Syndrome cases. Fatality numbers used by ACLED are known to be conservative.

## INTRODUCTION

Nodding Syndrome (NS) is a treatable, but otherwise progressive, childhood seizure disorder of probable environmental origin. This form of poorly understood epilepsy has occurred in certain East African populations subject to civil disruption, internal displacement, food insecurity, malnutrition, and nematode infection [1]. The apparent geographic association of an epidemic of NS (approximately 1998-2011) in northern Uganda and a civil war (1986-2006/8) between government forces and the Lord's Resistance Army (LRA), in which physical and psychological abuse and childhood abduction were rampant [2], has raised the possibility that wartime-related activities, as well as poverty and poor nutrition, contribute to culpability [3,4]. Many war-traumatized children with NS are reported to suffer from Developmental Trauma Disorder, a form of post-traumatic stress disorder with severe and prolonged depression, psychomotor retardation, fear and anxiety [5]. Wartime activities reportedly included the use of land mines and unspecified prohibited chemical weapons delivered by Ugandan Army helicopters in 2002-3 [6]. Reported "exposure to munitions" emerged as a significant association with NS in Uganda [7]; however, this association was with "gun raids and not chemicals" [1], and no evidence for exposure to warfare chemicals was found during a 2002 case-control investigation of a NS epidemic in then-southern Sudan [8]. A detailed analysis of possible etiologies associated with NS considered environmental, infectious and nutritional factors [9].

The Acholi Sub-Region of northern Uganda has been one of the areas most heavily impacted by both conflict and NS. Acholi communities affected by Nodding Syndrome attribute the illness experience to the trauma of past conflict, to poverty, and to region-bound frustration over neglect [10]. In 2011, the Ugandan Ministry of Health (MOH) estimated that up to 3000 children were affected in the three districts of Kitgum, Lamwo and Pader, with a prevalence of 1305 cases/100,000 in Labongo Akwang sub-county in Kitgum District [3]. Diagnostic criteria used at the time for MOH case identification are unknown to the present authors. In March 2013, the MOH with the U.S. Centers for Disease Control and Prevention (CDC) conducted a cluster survey to assess the prevalence of NS in Uganda using a new consensus case definition [11], which was

1  
2  
3 modified during the course of the investigation. Based on the modified definition, the  
4 estimated number of probable NS cases in children aged 5–18 years in the three  
5 northern Uganda districts was 1,687 (95% confidence interval [CI] = 1,463–1,912), for a  
6 prevalence of 680 (CI = 5.9–7.7) probable NS cases per 1,000 children aged 5–18 years  
7 in the three districts [12]. The 2011 MOH prevalence estimates were thus approximately  
8 double those recently reported in 2014 by MOH-CDC.  
9  
10  
11  
12

13  
14 We examine annual MOH reports of NS cases in relation to regional wartime conflict,  
15 casualties and household displacement in Kitgum District (Figure 1). We find a delayed  
16 temporal association between peaks in conflict events and fatalities. Peaks of reported  
17 NS also correlate with peaks of household displacement and prolonged residence in  
18 camps for internally displaced people (IDP), where residents were heavily dependent on  
19 food aid [13]. The camps were insecure, unsanitary and squalid, and morbidity and  
20 mortality rates were high [14]. Starting in the mid-1990s, these camps were established  
21 by the government of Uganda with the goal of protecting people from the LRA, including  
22 an estimated 285,000 from Kitgum District [15].  
23  
24  
25  
26  
27  
28  
29  
30

## 31 **METHODS**

32 The total number of NS cases in Kitgum District for the years 1998-2011 was obtained  
33 from the Ugandan Ministry of Health [MOH 2011, cited in 5]. Conflict events and fatalities  
34 in Kitgum District were derived from data obtained from the Armed Conflict Location &  
35 Event Data Project (ACLED) [16]. This comprehensive dataset contains information  
36 from 1997 on the specific dates and locations of political violence, the types of event, the  
37 groups involved, fatalities, and changes in territorial control of developing states,  
38 including Uganda. Information is recorded on the battles, killings, riots, and recruitment  
39 activities of rebels, governments, militias, armed groups, protesters and civilians. ACLED  
40 recorded over 80,000 individual events through early 2014, with ongoing data collection  
41 focused on Africa. Importantly, the estimated number of deaths (fatalities) are  
42 conservative because ACLED records the number of fatalities as ‘one hundred’ when  
43 reports from which they draw data describe “hundreds of fatalities”. Information on the  
44 relocation of households to IDP camps was obtained from the United Nations High  
45 Commission for Refugees [17]. Additional data were taken from peer-reviewed and other  
46 publicly available documents.  
47  
48  
49  
50  
51  
52  
53  
54  
55  
56  
57  
58  
59  
60

## RESULTS

Between the years 1997 and 2011, the period for which data are available, peaks in both conflict events and fatalities arise in 1998, 2000, and 2003 (Figure 2). Estimated fatalities are conservative because ACLED records the maximum number of fatalities per incident as 'one hundred'. Reports of NS in northern Uganda began to appear in 1997, with the first recorded cases in Kitgum in 1998 [15] (Table 1). Cases rapidly increased annually beginning in 2001, with peaks in 2004 (2003-5) and 2008, followed by a decline toward present-day baseline levels. The 2003-05 and 2008 peaks of NS cases appeared 6 and 5 years respectively after the 1998 and 2003 conflict casualty peaks.

Conflict in northern Uganda resulted in the relocation of the vast majority of the Acholi population to IDP camps. Figure 3 shows that relocation to IDP camps started slowly, increased markedly after a LRA massacre in January 1997, and slowly increased over subsequent years, with the highest peak in 2003 (the year of peak fatalities) before declining progressively thereafter. Nodding Syndrome cases appeared in 1998 and peaked in 2004, and increased to reach a higher peak in 2008, 7 and 5 years respectively after the peak influxes of households into the IDP camps. Of some 1.1 million IDPs in Acholi region, >63% remained in camps in 2005 because of local insecurities. As of the end of June 2007, 539,550 IDPs had returned to their homes and some 916,000 IDPs remained in the camps. Another 381,000 moved to new sites closer to their homes [17].

In Kitgum District, the first case of displacement took place in 1997, but the situation turned particularly bad between 2001 and 2002. Following the Uganda People's Defence Force's pursuit of the LRA into southern Sudan, there was a major escalation of LRA activity in northern Uganda. After the start of Operation Iron Fist in September 2002, a government operation aimed at crushing the LRA, almost the entire rural population (~1.3 million) of Gulu, Kitgum and Pader was forced to move to IDP camps. Conditions were described as appalling [18]. After the conflict had subsided, a sample of 210 households in Kitgum District showed that only 4.3% had not been displaced, 60% were planning to return to their homes directly, 21.4% through an intermediary location (satellite camps), and 14.3% were not planning to return to their home village [15].

**Table 1.** Annual events, ACLED-reported fatalities and approximate number of new Nodding Syndrome cases. Compilation of data from ACLED and Uganda Ministry of Health, September 2011 [originally cited in 16<sup>1</sup> and 5<sup>2</sup>].

| Year | Events <sup>1</sup> | Fatalities <sup>1</sup> | New NS Cases <sup>2</sup> |
|------|---------------------|-------------------------|---------------------------|
| 1997 | 22                  | 128                     |                           |
| 1998 | 57                  | 143                     | 3                         |
| 1999 | 13                  | 31                      | 2                         |
| 2000 | 19                  | 70                      | 5                         |
| 2001 | 8                   | 0                       | 4                         |
| 2002 | 42                  | 115                     | 25                        |
| 2003 | 53                  | 167                     | 38                        |
| 2004 | 33                  | 87                      | 42                        |
| 2005 | 21                  | 55                      | 36                        |
| 2006 | 8                   | 45                      | 52                        |
| 2007 | 2                   | 0                       | 70                        |
| 2008 | 1                   | 10                      | 82                        |
| 2009 | 0                   | 0                       | 62                        |
| 2010 | 0                   | 0                       | 46                        |
| 2011 | 1                   | 0                       |                           |

## CONCLUSION

We show a possible relationship between the annual incidence of MOH-diagnosed Nodding Syndrome and the annual number of conflict incidents and fatalities in preceding years. This supports an association between NS and wartime activities [3,4,7]. If the association is true, there is a latent period of approximately 5-6 years between the peak incidences of conflict/fatalities and NS cases, a disease that affects children tightly clustered around the ages of 5-15 years of age [1]. Civil conflict was

1  
2  
3 active in Acholi Sub-Region when the first reports of NS appeared in 1998, with  
4 thousands of residents fleeing villages in Gulu District in July 1996 after a wave of LRA  
5 violence. Cases of NS declined between 2008 and 2011 in line with the cessation of the  
6 war and signing of a peace agreement between the Ugandan government and LRA in  
7 February 2008.  
8  
9  
10

11  
12  
13 There are numerous reasons why conflict theoretically could be associated with NS.  
14 Exposure to warfare chemicals is readily posited but dismissed as highly improbable  
15 given the known neurotoxic properties of such substances, none of which causes  
16 repetitive head nodding from atonic seizures, let alone a progressive seizure disorder.  
17 Sudanese communities affected heavily by NS also experienced war and displacement  
18 but reported no symptoms consistent with neurotoxic exposures when questioned in  
19 2002 [9]. Moreover, Tanzanian children with signs consistent with NS acquired the brain  
20 disease in the absence of war or civil conflict [19]. Severe psychological trauma resulting  
21 from the sight of injury and death, and the personal fear associated therewith, have also  
22 been advanced as causal of “Psychological NS” but populations in other war zones have  
23 not succumbed to a comparable illness. Furthermore, there are no known reports of NS  
24 among the thousands of children who were abducted by the LRA and forced to conduct  
25 atrocities. Documentation is available of incidents described as “human rights abuses by  
26 the LRA” and “human rights violations by Ugandan Government forces” [2,6].  
27  
28  
29  
30  
31  
32  
33  
34  
35  
36

37  
38 There is also an apparent relationship between the peaks of NS cases in Kitgum District  
39 and earlier peak influxes of households into IDP camps. The 1997 peak influx is  
40 followed 7 years later by an elevated number of new NS cases in 2004 (2003-5), and the  
41 2003 large influx of households anticipates a larger peak in new NS cases 5 years later  
42 in 2008. Conditions in the IDP camps were exceptionally poor, with overcrowding,  
43 violence, food insecurity, and high potential for disease transmission. In 2005, a  
44 government survey of Kitgum estimated an IDP population of 310,111 persons, 21% of  
45 whom was under 5 years of age. At the time of the survey, over 66% of children were  
46 reported to have been ill sometime in the previous 2 weeks. Crude mortality rates were  
47 ~2 deaths per 10,000 per day and double that rate for children under the age of 5 years.  
48 Top self-reported causes of death in IDP camps were malaria/fever (34.7%), AIDS  
49 (15.1%) and violence (10.5%). An estimated 1216 persons were killed and an additional  
50 304 (mostly children) abducted during the first half of 2005. Water was obtained from  
51  
52  
53  
54  
55  
56  
57  
58  
59  
60



1  
2  
3 protected sources but water intake was low and waiting times high. Infant feeding  
4 practices were poor and, for children under the age of 5 years, the traditional disease  
5 concept of *two lango* or *gimiru*, a combination of oral thrush, malnutrition and diarrhea,  
6 was the second most commonly reported cause of death [20]. The World Food  
7 Programme provided food because ability to grow crops was limited due to security  
8 concerns [15]. Food quality was often extremely poor and, under normal conditions,  
9 would have been considered inedible. In some cases, security was so weak that food  
10 deliveries did not occur, with resulting hunger and malnutrition. Insecurity in IDP camps  
11 led to a migration of children (night commuters) to seek shelter in Kitgum hospitals,  
12 schools, municipal buildings, verandahs, parking lots and other open spaces [21].  
13 Unfortunately, there are no data on the incidence of NS among night commuters.  
14  
15  
16  
17  
18  
19  
20  
21

22  
23 The major limitation of this study is the accuracy of reports of the number of fatalities,  
24 displaced persons, and NS cases. Cited data are drawn from reports prepared by the  
25 Uganda Ministry of Health, international bodies, non-profit and other organizations.  
26 Reason for caution is illustrated by the report of a massacre on January, 7-12, 1997  
27 when “up to 412 civilians were killed by armed attackers in northwest Kitgum  
28 subcounties of Lokung and Palabek and in nearby areas.” [6]. This contrasts with the  
29 report of 128 fatalities in Kitgum throughout 1997 recorded in the ACLED database [16].  
30 ACLED fatality data are derived conservatively from a variety of sources, including  
31 research publications and reports from humanitarian agencies and local media. If a  
32 report mentions hundreds of fatalities, ACLED records the number as ‘one hundred’,  
33 which might explain the discrepancy.  
34  
35  
36  
37  
38  
39  
40  
41

42  
43 Taken in concert, there appears to be a reasonable correlation between IDP camp  
44 intake peaks and delayed NS peaks, which in turn show correspondence with prior  
45 conflict incidents and fatalities. Since the disease is clearly associated with prevailing  
46 environmental factors, but apparently not with polluted drinking water, suspicion falls on  
47 infectious and/or nutritional factors, including food type, quality, spoilage, or chemical  
48 contamination. This meshes with 2002 findings from then-southern Sudan where NS  
49 was associated with onchocerciasis and prevalent in sessile communities dependent for  
50 food on crops grown in small gardens but absent in cattle herders, the latter having  
51 access to meat, blood and milk [9]. When affected South Sudan were questioned by  
52 CDC investigators as to the source of their food, an unexplained association emerged  
53  
54  
55  
56  
57  
58  
59  
60

1  
2  
3 between NS and use of garden food rather than food purchased from the market or  
4 provided by the World Food Program (U.S. Centers for Disease Control, unpublished  
5 data). Additionally, a link between food available in IDP camps and NS would explain the  
6 apparent absence of this brain disorder in abducted children: while they served as  
7 fighters, porters, sex slaves and baby-sitters, they likely had better access to food,  
8 including freshly killed human body parts. Thus, the nature of any association between  
9 NS, nutrition and materials used for food, in addition to infection with nematode  
10 microfilariae (particularly *Onchocerca volvulus*) and war-related neuropsychological  
11 factors, would appear worthy of focused investigation.  
12  
13  
14  
15  
16  
17  
18  
19  
20  
21  
22  
23

## 24 **ACKNOWLEDGEMENTS**

25  
26  
27 This work was supported by the U.S. National Institute of Neurological Disorders &  
28 Stroke, grant number 1 R01 NS079276.  
29  
30  
31

32 **Competing Interests:** None.  
33  
34

## 35 **Authors' Contributions**

36  
37 All authors contributed to study design, data acquisition (principally J.L.) and data  
38 interpretation (principally P.S.S.) The paper was written by P.S.S. and edited by co-  
39 authors J.L. and V.S.P.  
40  
41  
42  
43  
44

45 **Data Sharing Statement:** No additional data available  
46  
47  
48  
49  
50  
51  
52  
53  
54  
55  
56  
57  
58  
59  
60

## REFERENCES

1. Dowell SF, Sejvar JJ, Riek L, et al. Nodding Syndrome. *Emerg Infect Dis* 2013;19:1374-84.
2. Anon. *Abducted and Abused: Renewed Conflict in Northern Uganda*. Human Rights Watch 15, 12A, 2003. <http://www.hrw.org/sites/default/files/reports/uganda0703.pdf> (accessed July 2014).
3. Bukuluki P., Ddumba-Nyanzi I, Kisuule JD, et al. Nodding Syndrome in post-conflict northern Uganda: A human security perspective. *Global Hlth Govern* 6, 2012. <http://www.ghgj.org> (accessed 10 July 2014).
4. Kitara DL, Amone C. Perception of the population in Northern Uganda to nodding syndrome. *J Med Med Sci* 2012;3:464-70.
5. Musisi S, Akena D, Nakimulu-Mpungu E, et al. Neuropsychiatric perspectives on nodding syndrome in northern Uganda: a case series study and a review. *Afr Hlth Sci* 2013;13:205-18.
6. Mulindwa HE. *Detailed Atrocities Caused in the Acholi Sub Region*. 26 Feb, 2012. <https://www.mail-archive.com/ugandanet@kym.net/msg27528.html> (accessed 10 July, 2014)
7. Foltz JL, Makumbi I, Sejvar JJ, et al. An epidemiologic investigation of potential risk factors for Nodding Syndrome in Kitgum District, Uganda. *PLoS One* 2013;8:e66419.
8. Tumwine JK, Vandemaele K, Chungong S, et al. Clinical and epidemiologic characteristics of nodding syndrome in Mundri County, southern Sudan. *Afr Health Sci* 2012;12:242-8.
9. Spencer PS, Vandemaele K, Richer M, et al. Nodding syndrome in Mundri County, South Sudan: environmental, nutritional and infectious factors. *Afr Health Sci* 2013;13:183-204.

- 1  
2  
3  
4  
5 10. van Bommel K, Derluyn I, Stroeken K. Nodding syndrome or disease? On the  
6 conceptualization of an illness-in-the-making. *Ethn Health* 2014;19:100-18.  
7  
8  
9  
10 11. World Health Organization. International Scientific Meeting on Nodding Syndrome,  
11 Kampala, Uganda, 30 July–1 August 2012: meeting report. Geneva, Switzerland: World  
12 Health Organization; 2012. Available at  
13 [http://www.who.int/neglected\\_diseases/diseases/Nodding\\_syndrom\\_Kampala\\_Report\\_2](http://www.who.int/neglected_diseases/diseases/Nodding_syndrom_Kampala_Report_2012.pdf)  
14 [012.pdf](http://www.who.int/neglected_diseases/diseases/Nodding_syndrom_Kampala_Report_2012.pdf)  
15  
16  
17  
18  
19 12. Iyengar PJ, Wamala J, Ratto J, et al. Prevalence of nodding syndrome--Uganda,  
20 2012-2013. *MMWR Morb Wkly Rep* 2014;63:603-6.  
21  
22  
23  
24 13. World Food Programme. *Emergency Food Security Assessment of IDP Camps in*  
25 *Gulu, Kitgum, Kira and Pader Districts, March-May 2005*. September, 2005.  
26 <http://documents.wfp.org/stellent/groups/public/documents/ena/wfp079422.pdf>  
27 (accessed 10 July 2014).  
28  
29  
30  
31  
32 14. Bozzoli C, Brzzo T. *Child Mortality and Camp Decongestion in Post-war Uganda*.  
33 Microcon Research Working Paper 24, Brighton, May 2010.  
34 [http://www.microconflict.eu/publications/RWP24\\_CB\\_TB.pdf](http://www.microconflict.eu/publications/RWP24_CB_TB.pdf) (accessed 10 July 2014).  
35  
36  
37  
38  
39 15. World Food Programme. *Food Security Assessment of IDP Camps in Gulu, Kitgum,*  
40 *and Pader Districts, October 2006. Final Report*. January 2007.  
41 <http://documents.wfp.org/stellent/groups/public/documents/ena/wfp120444.pdf>  
42 (accessed 10 July 2014).  
43  
44  
45  
46  
47 16. Raleigh C, Linke A, HåvardH, Karlsen J. Introduced ACLED – Armed Conflict  
48 Location and Event Data. *J Peace Res* 2010;47:1-10. [www.acleddata.com](http://www.acleddata.com) (accessed 10  
49 July 2014).  
50  
51  
52  
53  
54 17. Russo R. *Uganda's IDP Camps Start to Close as Peace Takes Hold*. September 11,  
55 2007. <http://www.unhcr.org/46e6a68013.html> (accessed 10 July 2014).  
56  
57  
58  
59  
60

1  
2  
3 18. Boas M, Hartley A. *Northern Uganda Internally Displaced Persons Profiling Study*.  
4 Vol 1, United Nations Development Programme. 2005.  
5  
6 [http://www.fafo.no/ais/africa/uganda/IDP\\_uganda\\_2005.pdf](http://www.fafo.no/ais/africa/uganda/IDP_uganda_2005.pdf) (accessed 10 July 2014).  
7  
8

9  
10 19. Spencer PS, Palmer VS, Jilek-Aall L. Nodding syndrome: origins and natural history  
11 of a longstanding epileptic disorder in sub-Saharan Africa. *Afr Health Sci* 2013;13:176-  
12 82, 2013.  
13

14  
15  
16 20. Uganda Ministry of Health. *Health and Mortality Survey Among Internally Displaced*  
17 *Persons in Gulu, Kitgum and Pader Districts, Northern Uganda*. World Health  
18 Organization, Geneva, July, 2005.  
19  
20 <http://www.who.int/hac/crises/uga/sitreps/Ugandamortsurvey.pdf> (accessed 10 July  
21 2014).  
22  
23

24  
25  
26 21. United Nations. *An Account of Life in Northern Uganda*. oOCHA RSO-CEA and IRIN,  
27 2004. <http://www.irinnews.org/pdf/in-depth/when-the-sun-sets-revised-edition.pdf>.  
28 (accessed 10 July 2014).  
29  
30

## 31 32 **FIGURE LEGENDS**

### 33 34 35 **Figure 1.**

36 Kitgum District (*center*), northern Uganda, one of three districts heavily impacted by  
37 Nodding Syndrome  
38  
39

### 40 41 42 **Figure 2.**

43 Temporal relationship between conflict events, fatalities (number of deaths) and  
44 approximate number of new MOH-reported cases of Nodding Syndrome. Kitgum District,  
45 1997-2011.  
46  
47  
48

### 49 50 **Figure 3.**

51 Temporal relationship between new MOH-reported cases of Nodding Syndrome relative  
52 to household relocation to IDP camps. Kitgum District, 2005 [21].  
53  
54  
55  
56  
57  
58  
59  
60

1  
2  
3  
4  
5  
6  
7  
8  
9  
10  
11  
12  
13  
14  
15  
16  
17  
18  
19  
20  
21  
22  
23  
24  
25  
26  
27  
28  
29  
30  
31  
32  
33  
34  
35  
36  
37  
38  
39  
40  
41  
42  
43  
44  
45  
46  
47  
48  
49  
50  
51  
52  
53  
54  
55  
56  
57  
58  
59  
60

**Nodding Syndrome in Kitgum District, Uganda:  
Association with Conflict and Internal Displacement**

Jesa L. Landis<sup>1</sup>  
Valerie S. Palmer<sup>1,2</sup>  
Peter S. Spencer<sup>1,2</sup>

<sup>1</sup>Global Health Center and <sup>2</sup>Department of Neurology, School of Medicine, Oregon Health & Science University, Portland, Oregon 97201

**Corresponding Author:**

Dr. Peter S. Spencer  
Oregon Health & Science University  
3181 S.W. Sam Jackson Park Road, L356  
Portland, Oregon 97239  
Email: [spencer@ohsu.edu](mailto:spencer@ohsu.edu)  
Tel. 001-503-209-0986

**Key Words:** Epilepsy, Conflict, Internal Displacement Camp, Food Insecurity

**Word Count:** 1937 words

FOR

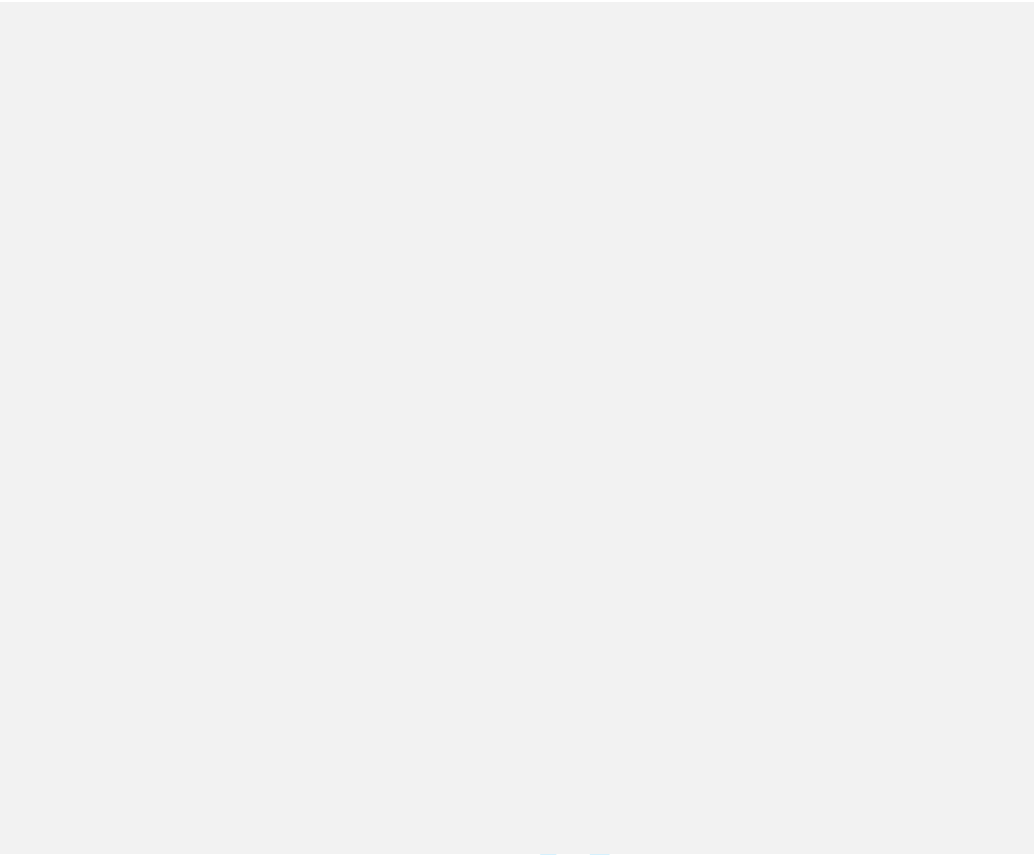

7

**ABSTRACT**

**Objectives.** To ~~examine the test for any~~ temporal association of Nodding Syndrome with wartime conflict, casualties and household displacement in Kitgum District, northern Uganda.

**Methods.** Data were obtained from publicly available information reported by the Ugandan Ministry of Health ([MOH](#)), the Armed Conflict Location & Event Data ([ACLED](#)) Project of the University of Sussex in the U.K., peer-reviewed publications in professional journals, and other sources.

**Results.** Reports of Nodding Syndrome began to appear in 1997, with the first recorded cases in Kitgum District in 1998. Cases rapidly increased annually beginning in 2001, with peaks in 2003-5 and 2008, ~~5-6~~ years after peaks in the number of wartime conflicts and fatalities. Additionally, peaks of Nodding Syndrome cases followed peak influxes 5-7 years earlier of households into Internal Displacement Camps.

**Conclusion.** ~~Peaks of Nodding Syndrome reported by the MOH are~~ temporally associated with, ~~but temporally displaced from, peaks of~~ wartime conflicts, fatalities, and ~~particularly with household internment, where infectious disease rates were high~~ ~~was~~ ~~rampant~~ and food insecurity rife.

**Strengths and Limitations of this Study**

- ~~Diagnostic accuracy of Nodding Syndrome probably very high because of~~ ~~while~~ ~~distinctive~~ clinical signs (~~head nodding~~) of Nodding Syndrome are distinct and readily recognized, ~~the diagnostic criteria used by a MOH between 1998-2011 appear to have overestimated case prevalence two-fold based on the current MOH-CDC case definition-~~

- Study focused on a localized area with a very high prevalence (12/1000) of children with ~~probable~~ Nodding Syndrome, as reported by the U.S. Centers for Disease Control ([CDC](#)) [7].

- Uncertainty regarding the accuracy of governmental and non-governmental reports of the number of fatalities, displaced persons, and Nodding Syndrome cases. ~~Fatality numbers used by ACLED are known to be conservative.~~

1  
2  
3  
4  
5  
6  
7  
8  
9  
10  
11  
12  
13  
14  
15  
16  
17  
18  
19  
20  
21  
22  
23  
24  
25  
26  
27  
28  
29  
30  
31  
32  
33  
34  
35  
36  
37  
38  
39  
40  
41  
42  
43  
44  
45  
46  
47  
48  
49  
50  
51  
52  
53  
54  
55  
56  
57  
58  
59  
60

FOR PEER REVIEW

**INTRODUCTION**

Nodding Syndrome (NS) is a treatable, but otherwise progressive, childhood seizure disorder of probable environmental origin. Epidemics of this form of poorly understood epilepsy have occurred in certain East African populations subject to civil disruption, internal displacement, food insecurity, malnutrition, and nematode infection [1]. The apparent temporal-geographic association of an epidemic of NS (approximately 1998-2011) in northern Uganda and a civil war (1986-2006/8) between government forces and the Lord's Resistance Army (LRA), in which physical and psychological abuse and childhood abduction were rampant [2], has raised the possibility that wartime-related activities, as well as poverty and poor nutrition, are culpable contributors to culpability [3,4]. Many war-traumatized children with NS are reported to suffer from Developmental Trauma Disorder, a form of post-traumatic stress disorder with severe and prolonged depression, psychomotor retardation, fear and anxiety [5]. Wartime activities reportedly included the use of land mines and unspecified prohibited chemical weapons delivered by Ugandan Army helicopters in 2002-3 [6]. Reported exposure to munitions emerged as a significant association with NS in Uganda [7]; however, this association was with "gun raids and not chemicals" [1], but no evidence for exposure to warfare chemicals was found during an earlier 2002 case-control investigation of a NS epidemic in South-then-southern Sudan [8]. A detailed analysis of possible etiologies associated with the epidemic NS considered environmental, infectious and nutritional factors highlighted neurotoxins in plant materials used for food [9].

The Acholi Sub-Region of northern Uganda has been one of the areas most heavily impacted by both conflict and NS. Acholi communities affected by Nodding Syndrome attribute the illness experience to the trauma of past conflict, to poverty, and to region-bound frustration over neglect [10]. In 2011, the Ugandan Ministry of Health (MOH) estimated that up to 3000 children were affected in the three districts of

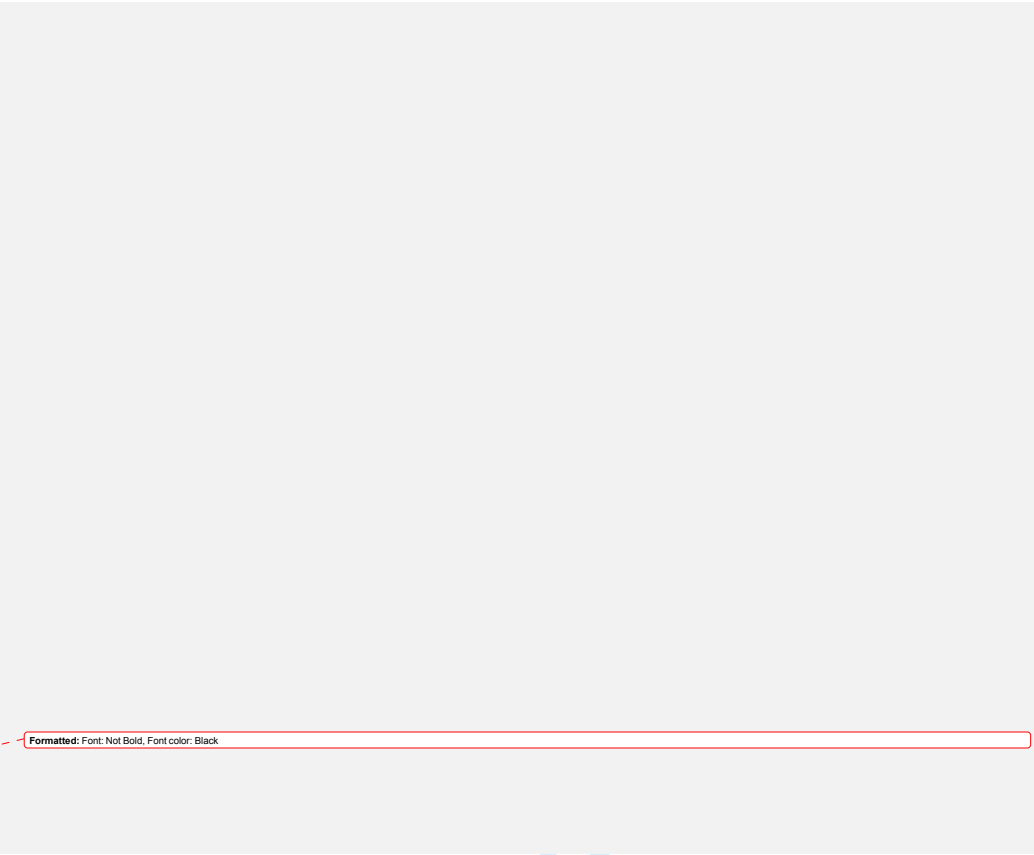

Formatted: Font: Not Bold, Font color: Black



1  
2  
3  
4  
5  
6  
7  
8  
9  
10  
11  
12  
13  
14  
15  
16  
17  
18  
19  
20  
21  
22  
23  
24  
25  
26  
27  
28  
29  
30  
31  
32  
33  
34  
35  
36  
37  
38  
39  
40  
41  
42  
43  
44  
45  
46  
47  
48  
49  
50  
51  
52  
53  
54  
55  
56  
57  
58  
59  
60

FOR

Kitgum, Lamwo and Pader, with a prevalence of 1305 cases/100,000 in Labongo Akwang sub-county in Kitgum District [3]. Diagnostic criteria used at the time for MOH case identification are unknown to the present authors. In March 2013, the MOH with the U.S. Centers for Disease Control and Prevention (CDC) conducted a cluster survey to assess the prevalence of NS in Uganda using a new consensus case definition [11] which was modified during the course of the investigation. Based on the modified definition, the estimated number of probable NS cases in children aged 5–18 years in the three northern Uganda districts was 1,687 (95% confidence interval [CI] = 1,463–1,912), for a prevalence of 680 (CI = 5.9–7.7) probable NS cases per 1,000 children aged 5–18 years in the three districts [12]. The 2011 MOH prevalence estimates were thus approximately double those recently reported in 2014 by MOH-CDC.

Here, we examine the temporal association of annual MOH reports of NS cases in relation to NS with regional wartime conflict, casualties and household displacement in Kitgum District (Figure 1) (Figure 4). We find a delayed temporal association between peaks in conflict events and fatalities. Peaks of Nodding Syndrome reported NS also correlates with peaks of household displacement and prolonged residence in camps for internally displaced people (IDP), where residents were heavily dependent on food aid [13]. The camps were insecure, unsanitary and squalid, and morbidity and mortality rates were high [14]. Starting in the mid-1990s, these camps were established by the government of Uganda with the goal of protecting people from the LRA, including an estimated 285,000 from Kitgum District [15].

**METHODS**

The total number of NS cases in Kitgum District for the years 1998–2011 was obtained from the Ugandan Ministry of Health [MOH 2011, cited in 5]. Conflict events and fatalities in Kitgum District were derived from data obtained from the Armed Conflict Location & Event Data Project (ACLED) [16]. This comprehensive dataset contains information from 1997 on the specific dates and locations of political violence, the types of event, the groups involved, fatalities, and changes in territorial control of developing states, including Uganda. Information is recorded on the battles, killings, riots, and recruitment activities of rebels, governments, militias, armed groups, protesters and civilians. ACLED

Formatted: Font: (Default) Arial, 11 pt, Font color: Black  
Formatted: Font: (Default) Arial, 11 pt, Font color: Black  
Formatted: Font: (Default) Arial, 11 pt, Font color: Black  
Formatted: Font: Not Bold, Font color: Black  
Formatted: Font: (Default) Arial, 11 pt, Font color: Black  
Formatted: Font: (Default) Arial, 11 pt, Font color: Black  
Formatted: Font: Not Bold, Font color: Black  
Formatted: Font: (Default) Arial, 11 pt, Font color: Black

1  
2  
3  
4  
5  
6  
7  
8  
9  
10  
11  
12  
13  
14  
15  
16  
17  
18  
19  
20 recorded over 80,000 individual events through early 2014, with ongoing data collection  
21 focused on Africa. Importantly, the estimated number of deaths (fatalities) are  
22 conservative because ACLED records the number of fatalities as 'one hundred' when  
23 reports from which they draw data describe 'hundreds of fatalities'. Information on the  
24 relocation of households to IDP camps was obtained from the United Nations High  
25 Commission for Refugees [174]. Other-Additional data were taken from peer-reviewed  
26 and other publicly available documents.

#### RESULTS

27 Between the years 1997 and 2011, the period during-for which data are available, peaks  
28 in both conflict events and fatalities arise in 1998, 2000, and 2003 (Figure 2). Estimated  
29 fatalities are conservative because ACLED records the maximum number of fatalities  
30 per incident as 'one hundred'. Reports of NS in northern Uganda began to appear in  
31 1997, with the first recorded cases in Kitgum in 1998 [15] (Table 1). Cases rapidly  
32 increased annually beginning in 2001, with peaks in 2004 (2003-5) and 2008, followed  
33 by a decline toward present-day baseline levels. The 2003-05 and 2008 peaks of NS  
34 cases appeared 5-6-6 and 5 years respectively after the 1998 and 2003<sup>0</sup> conflict  
35 casualty peaks. Similarly, the 2000 and 2003 fatality peaks were followed 4-5 years later  
36 by peaks in NS cases.

37 Conflict in northern Uganda resulted in the relocation of the vast majority of the Acholi  
38 population to IDP camps. Figure 3 shows that relocation to IDP camps started slowly,  
39 increased markedly after a LRA massacre in January 1997, and slowly increased over  
40 subsequent years, with the highest peak in 2003 (the year of peak fatalities) before  
41 declining progressively thereafter. Nodding Syndrome cases appeared in 1998 and  
42 peaked in 2004, and increased to reach a higher peak in 2008, 7 and 5 years  
43 respectively after the peak influxes of households into the IDP camps. Of some 1.1  
44 million IDPs in Acholi region, >63% remained in camps in 2005 because of local  
45 insecurities. As of the end of June 2007, 539,550 IDPs had returned to their homes and  
46 some 916,000 IDPs remained in the camps. Another 381,000 moved to new sites closer  
47 to their homes [174].  
48  
49  
50  
51  
52  
53  
54  
55  
56  
57  
58  
59  
60

**Table 1.** Annual events, [ACLEED-reported](#) fatalities and approximate number of new Nodding Syndrome cases. Compilation of data from [ACLEED](#) and Uganda Ministry of Health, September 2011 [originally cited in [153](#) and [5](#)].

| Year | Events <sup>1</sup> | Fatalities <sup>1</sup> | New NS Cases <sup>2</sup> |
|------|---------------------|-------------------------|---------------------------|
| 1997 | 22                  | 128                     |                           |
| 1998 | 57                  | 143                     | 3                         |
| 1999 | 13                  | 31                      | 2                         |
| 2000 | 19                  | 70                      | 5                         |
| 2001 | 8                   | 0                       | 4                         |
| 2002 | 42                  | 115                     | 25                        |
| 2003 | 53                  | 167                     | 38                        |
| 2004 | 33                  | 87                      | 42                        |
| 2005 | 21                  | 55                      | 36                        |
| 2006 | 8                   | 45                      | 52                        |
| 2007 | 2                   | 0                       | 70                        |
| 2008 | 1                   | 10                      | 82                        |
| 2009 | 0                   | 0                       | 62                        |
| 2010 | 0                   | 0                       | 46                        |
| 2011 | 1                   | 0                       |                           |

In Kitgum District, the first case of displacement took place in 1997, but the situation turned particularly bad between 2001 and 2002. Following the Uganda People's Defence Force's pursuit of the LRA into southern Sudan, there was a major escalation of LRA activity in northern Uganda. After the start of Operation Iron Fist in September 2002, a government operation aimed at crushing the LRA, almost the entire rural population (~1.3 million) of Gulu, Kitgum and Pader was forced to move to IDP camps. Conditions were described as appalling [[155](#)]. After the conflict had subsided, a sample of 210 households in Kitgum District showed that only 4.3% had not been displaced, 60% were planning to return to their homes directly, 21.4% through an intermediary location (satellite camps), and 14.3% were not planning to return to their home village [[152](#)].

## CONCLUSION

We show a possible relationship between the annual incidence of MOH-diagnosed Nodding Syndrome and the annual number of conflict incidents and fatalities in preceding years. This supports an association between NS and wartime activities [3,4,7]. If the association is true, there is a latent period of approximately 5-6 years between the peak incidences of conflict/fatalities and NS cases, a disease that affects children tightly clustered around the ages of 5-15 years of age [1]. However, the Civil conflict-war was in full flight in Acholi Sub-Region when the first reports of NS appeared in 1998, with thousands of residents fleeing villages in Gulu District in July 1996 after a wave of LRA violence. Cases of NS declined since-between 2008 and 2011 in line with the cessation of the war and signing of a peace agreement between the Ugandan government and LRA in February 2008.

There are numerous reasons why conflict theoretically could be associated with NS. Exposure to warfare chemicals is readily posited but dismissed as highly improbable given the known neurotoxic properties of such substances, none of which causes repetitive head nodding from atonic seizures, let alone a progressive seizure disorder. Sudanese communities affected heavily by NS also experienced war and displacement but reported no symptoms consistent with neurotoxic exposures when questioned in 2002 [9]. Moreover, Tanzanian children with signs consistent with NS acquired the brain disease in the absence of war or civil conflict [196]. Severe psychological trauma resulting from the sight of injury and death, and the personal fear associated therewith, have also been advanced as causal of "Psychological NS" but populations in other war zones have not succumbed to a comparable illness. Furthermore, there are no known reports of NS among the thousands of children who were abducted by the LRA and forced to conduct atrocities. Documentation is available of incidents described as "human rights abuses by the LRA" and "human rights violations by Ugandan Government forces" [2,6].

There is also an apparent relationship between the peaks of NS cases in Kitgum District and earlier peak influxes of households into IDP camps. The 1997 peak influx is followed 7 years later by an elevated number of new NS cases in 2004 (2003-5), and the 2003 large influx of households anticipates a larger peak in new NS cases 5 years later

1  
2  
3  
4  
5  
6  
7  
8  
9  
10  
11  
12  
13  
14  
15  
16  
17  
18  
19  
20  
21  
22  
23  
24  
25  
26  
27  
28  
29  
30  
31  
32  
33  
34  
35  
36  
37  
38  
39  
40  
41  
42  
43  
44  
45  
46  
47  
48  
49  
50  
51  
52  
53  
54  
55  
56  
57  
58  
59  
60

in 2008. Conditions in the IDP camps were exceptionally poor, with overcrowding, violence, food insecurity, and high potential for disease transmission. In 2005, a government survey of Kitgum estimated an IDP population of 310,111 persons, 21% of whom was under 5 years of age. At the time of the survey, over 66% of children were reported to have been ill sometime in the previous 2 weeks. Crude mortality rates were ~2 deaths per 10,000 per day and double that rate for children under the age of 5 years. Top self-reported causes of death in IDP camps were malaria/fever (34.7%), AIDS (15.1%) and violence (10.5%). An estimated 1216 persons were killed and an additional 304 (mostly children) abducted during the first half of 2005. Water was obtained from protected sources but water intake was low and waiting times high. Infant feeding practices were poor and, for children under the age of 5 years, the traditional disease concept of *two lango* or *gimiru*, a combination of oral thrush, malnutrition and diarrhea, was the second most commonly reported cause of death [2047]. The World Food Programme provided food because ability to grow crops was limited due to security concerns [152]. Food quality was often extremely poor and, under normal conditions, would have been considered inedible. In some cases, security was so weak that food deliveries did not occur, with resulting hunger and malnutrition. Insecurity in IDP camps led to a migration of children (night commuters) to seek shelter in Kitgum hospitals, schools, municipal buildings, verandahs, parking lots and other open spaces [2148]. Unfortunately, there are no data on the incidence of NS among night commuters.

The major limitation of this study is the accuracy of reports of the number of fatalities, displaced persons, and NS cases. Cited data are drawn from reports prepared by the Uganda Ministry of Health, international bodies, non-profit and other organizations. Reason for caution is illustrated by the report of a massacre on January, 7-12, 1997 when "up to 412 civilians were killed by armed attackers in northwest Kitgum subcounties of Lokung and Palabek and in nearby areas." [6]. This contrasts with the report of 128 fatalities in Kitgum throughout 1997 recorded in the ACLED database [163]. ACLED fatality data are derived conservatively from a variety of sources, including research publications and reports from humanitarian agencies and local media. If a report mentions hundreds of fatalities, ACLED records the number as 'one hundred', which might explain the discrepancy.

1  
2  
3  
4  
5  
6  
7  
8  
9  
10  
11  
12  
13  
14  
15  
16  
17  
18  
19  
20  
21  
22  
23  
24  
25  
26  
27  
28  
29  
30  
31  
32  
33  
34  
35  
36  
37  
38  
39  
40  
41  
42  
43  
44  
45  
46  
47  
48  
49  
50  
51  
52  
53  
54  
55  
56  
57  
58  
59  
60

FOR

Taken in concert, there appears to be a reasonable correlation between IDP camp intake peaks and delayed NS peaks, which in turn show correspondence with prior conflict incidents and fatalities. Since the disease is clearly associated with prevailing environmental factors, but apparently not with polluted drinking water, suspicion falls heavily on infectious and/or nutritional factors, including food type, quality, or spoilage, or chemical contamination. This meshes with findings-2002 findings from then-southern Sudan where NS was associated with onchocerciasis and prevalent in sessile communities dependent for food on crops grown in small gardens but absent in cattle herders, the latter having access to meat, blood and milk [9]. When affected South Sudan were questioned by CDC investigators as to the source of their food, a strong unexplained association emerged between NS and use of garden food rather than food purchased from the market or provided by the World Food Program (U.S. Centers for Disease Control, unpublished data). Additionally, a link between food available in IDP camps and NS would explain the apparent absence of this brain disorder in abducted children: while they served as fighters, porters, sex slaves and baby-sitters, they likely had better access to food, including freshly killed human body parts. Thus, the nature of any association between NS, nutrition and materials used for food, in addition to infection with nematode microfilariae (particularly *Onchocerca volvulus*) and war-related neuropsychological factors, would appear worthy of focused investigation.

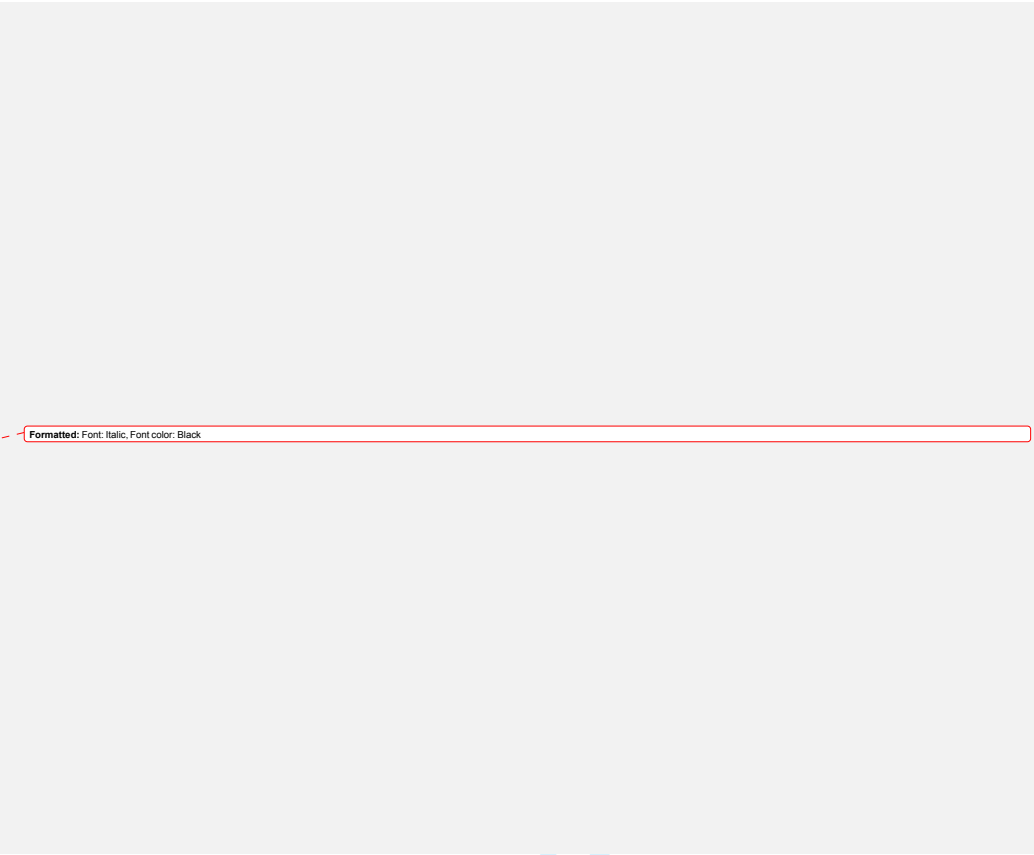

Formatted: Font: Italic, Font color: Black

FOR

1  
2  
3  
4  
5  
6  
7  
8  
9  
10  
11  
12  
13  
14  
15  
16  
17  
18  
19  
20  
21  
22  
23  
24  
25  
26  
27  
28  
29  
30  
31  
32  
33  
34  
35  
36  
37  
38  
39  
40  
41  
42  
43  
44  
45  
46  
47  
48  
49  
50  
51  
52  
53  
54  
55  
56  
57  
58  
59  
60

**ACKNOWLEDGEMENTS**

This work was supported by the U.S. National Institute of Neurological Diseases & Stroke, grant number 1 R01 NS079276.

**Competing Interests:** None.

**Authors' Contributions**

All authors contributed to study design, data acquisition (principally J.L.) and data interpretation (principally P.S.S.) The paper was written by P.S.S. and edited by co-authors J.L. and V.S.P.

**Data Sharing Statement:** No additional data available

1  
2  
3  
4  
5  
6  
7  
8  
9  
10  
11  
12  
13  
14  
15  
16  
17  
18  
19  
20  
21  
22  
23  
24  
25  
26  
27  
28  
29  
30  
31  
32  
33  
34  
35  
36  
37  
38  
39  
40  
41  
42  
43  
44  
45  
46  
47  
48  
49  
50  
51  
52  
53  
54  
55  
56  
57  
58  
59  
60

#### REFERENCES

1. [Dowell SF, Seivar JJ, Riek L, et al. Nodding Syndrome. \*Emerg Infect Dis\* 2013;19:1374-84.](#)
2. [Anon. \*Abducted and Abused: Renewed Conflict in Northern Uganda\*. Human Rights Watch 15, 12A, 2003. <http://www.hrw.org/sites/default/files/reports/uganda0703.pdf> \(accessed July 2014\).](#)
3. [Bukuluki P., Ddumba-Nyanzi I, Kisuule JD, et al. Nodding Syndrome in post-conflict northern Uganda: A human security perspective. \*Global Health Govern\* 6, 2012. <http://www.ghgj.org> \(accessed 10 July 2014\).](#)
4. [Kitara DL, Amon C. Perception of the population in Northern Uganda to nodding syndrome. \*J Med Med Sci\* 2012;3:464-70.](#)
5. [Musisi S, Akena D, Nakimulu-Mpungu E, et al. Neuropsychiatric perspectives on nodding syndrome in northern Uganda: a case series study and a review. \*Afr Hlth Sci\* 2013;13:205-18.](#)
6. [Mulindwa HE. \*Detailed Atrocities Caused in the Acholi Sub Region\*. 26 Feb. 2012. <https://www.mail-archive.com/ugandanet@kym.net/msg27528.html> \(accessed 10 July 2014\)](#)



- 1  
2  
3  
4  
5  
6  
7  
8  
9  
10  
11  
12  
13  
14  
15  
16  
17  
18  
19  
20  
21  
22  
23  
24  
25  
26  
27  
28  
29  
30  
31  
32  
33  
34  
35  
36  
37  
38  
39  
40  
41  
42  
43  
44  
45  
46  
47  
48  
49  
50  
51  
52  
53  
54  
55  
56  
57  
58  
59  
60
7. Foltz JL, Makumbi I, Seivar JJ, et al. An epidemiologic investigation of potential risk factors for Nodding Syndrome in Kitgum District, Uganda. *PLoS One* 2013;8:e66419.
8. Tumwine JK, Vandemaële K, Chungong S, et al. Clinical and epidemiologic characteristics of nodding syndrome in Mundri County, southern Sudan. *Afr Health Sci* 2012;12:242-8.
9. Spencer PS, Vandemaële K, Richer M, et al. Nodding syndrome in Mundri County, South Sudan: environmental, nutritional and infectious factors. *Afr Health Sci* 2013;13:183-204.
10. van Bommel K, Derluyn I, Stroeken K. Nodding syndrome or disease? On the conceptualization of an illness-in-the-making. *Ethn Health* 2014;19:100-18.
11. World Health Organization. International Scientific Meeting on Nodding Syndrome, Kampala, Uganda, 30 July–1 August 2012: meeting report. Geneva, Switzerland: World Health Organization; 2012. Available at [http://www.who.int/neglected\\_diseases/diseases/Nodding\\_syndrom\\_Kampala\\_Report\\_2012.pdf](http://www.who.int/neglected_diseases/diseases/Nodding_syndrom_Kampala_Report_2012.pdf)
12. Iyengar PJ, Wamala J, Ratto J, et al. Prevalence of nodding syndrome—Uganda, 2012–2013. *MMWR Morb Wkly Rep* 2014;63:603-6.
13. World Food Programme. *Emergency Food Security Assessment of IDP Camps in Gulu, Kitgum, Kira and Pader Districts, March–May 2005*. September, 2005. <http://documents.wfp.org/stellen/groups/public/documents/enawfp079422.pdf> (accessed 10 July 2014).
14. Bozzoli C, Brzzo T. *Child Mortality and Camp Decongestion in Post-war Uganda*. Microcon Research Working Paper 24, Brighton, May 2010. [http://www.microconflict.eu/publications/RWP24\\_CB\\_TB.pdf](http://www.microconflict.eu/publications/RWP24_CB_TB.pdf) (accessed 10 July 2014).
15. World Food Programme. *Food Security Assessment of IDP Camps in Gulu, Kitgum, and Pader Districts, October 2006. Final Report*. January 2007.

1  
2  
3  
4  
5  
6  
7  
8  
9  
10  
11  
12  
13  
14  
15  
16  
17  
18  
19  
20 <http://documents.wfp.org/stellen/groups/public/documents/ena/wfp120444.pdf>  
21 (accessed 10 July 2014).

22 [16. Raleigh C, Linke A, HåvardH, Karlsen J. Introduced ACLED – Armed Conflict](#)  
23 [Location and Event Data. \*J Peace Res\* 2010;47:1-10. www.acleddata.com \(accessed 10](#)  
24 [July 2014\).](#)

25 [17. Russo R. Uganda's IDP Camps Start to Close as Peace Takes Hold. September 11,](#)  
26 [2007. <http://www.unhcr.org/46e6a68013.html> \(accessed 10 July 2014\).](#)

27 [18. Boas M, Hartley A. Northern Uganda Internally Displaced Persons Profiling Study,](#)  
28 [Vol 1. United Nations Development Programme, 2005.](#)  
29 [http://www.fao.org/africa/uganda/IDP\\_uganda\\_2005.pdf \(accessed 10 July 2014\).](#)

30 [19. Spencer PS, Palmer VS, Jilek-Aali L. Nodding syndrome: origins and natural history](#)  
31 [of a longstanding epileptic disorder in sub-Saharan Africa. \*Afr Health Sci\* 2013;13:176-](#)  
32 [62, 2013.](#)

33 [20. Uganda Ministry of Health. Health and Mortality Survey Among Internally Displaced](#)  
34 [Persons in Gulu, Kitgum and Pader Districts, Northern Uganda. World Health](#)  
35 [Organization, Geneva, July, 2005.](#)  
36 [http://www.who.int/hac/crises/uga/sitreps/Ugandamortsurvey.pdf \(accessed 10 July](#)  
37 [2014\).](#)

38 [21. United Nations. An Account of Life in Northern Uganda. oOCHA RSO-CEA and IRIN,](#)  
39 [2004. <http://www.irinnews.org/pdf/in-depth/when-the-sun-sets-revised-edition.pdf>,](#)  
40 [\(accessed 10 July 2014\).](#)

41 [4. Dowell SF, Sejvar JJ, Rieck L, et al. Nodding Syndrome. \*Emerg Infect Dis\*](#)  
42 [2013;19:1374-84.](#)

43 [2. Anon. Abducted and Abused: Renewed Conflict in Northern Uganda. Human Rights](#)  
44 [Watch 15, 12A, 2003. <http://www.hrw.org/sites/default/files/reports/uganda0703.pdf>,](#)  
45 [\(accessed July 2014\).](#)

Formatted: Default Paragraph Font, Font color: Black

3-Bukuluki P., Ddumba-Nyanzi I, Kiseule JD, et al. Nodding Syndrome in post-conflict northern Uganda: A human security perspective. *Global Health Govern* 6, 2012. <http://www.ghgj.org> (accessed 10 July 2014).

Formatted: Default Paragraph Font, Font color: Black

4-Kitara DL, Amone C. Perception of the population in Northern Uganda to nodding syndrome. *J Med Med Sci* 2012;3:484-70.

5-Musisi S, Akene D, Nakimulu Mpungu E, et al. Neuropsychiatric perspectives on nodding syndrome in northern Uganda: a case series study and a review. *Afr Health Sci* 2013;13:205-18.

6-Mulindwa HE. Detailed Atrocities Caused in the Acholi Sub-Region. 26 Feb. 2012. <https://www.mail-archive.com/ugandanel@kym.net/msg27528.html> (accessed 10 July 2014).

Formatted: Default Paragraph Font, Font: (Default) Cambria, 12 pt

7-Foltz JL, Makumbi I, Sejvar JJ, et al. An epidemiologic investigation of potential risk factors for Nodding Syndrome in Kitgum District, Uganda. *PLoS One* 2013;8:e66419.

8-Tumwine JK, Vandemaele K, Chungong S, et al. Clinical and epidemiologic characteristics of nodding syndrome in Mundri County, southern Sudan. *Afr Health Sci* 2012;12:242-8.

9-Spencer PS, Vandemaele K, Richer M, et al. Nodding syndrome in Mundri County, South Sudan: environmental, nutritional and infectious factors. *Afr Health Sci* 2013;13:183-204.

10-World Food Programme. *Emergency Food Security Assessment of IDP Camps in Gulu, Kitgum, Kira and Pader Districts, March-May 2006-September, 2006*. <http://documents.wfp.org/stellent/groups/public/documents/ena/wfp070422.pdf> (accessed 10 July 2014).

Formatted: Default Paragraph Font, Font color: Black

11-Bozzoli C, Brizzo T. *Child Mortality and Camp Decongestion in Post-war Uganda*.

1  
2  
3  
4  
5  
6  
7  
8  
9  
10  
11  
12  
13  
14  
15  
16  
17  
18  
19  
20  
21  
22  
23  
24  
25  
26  
27  
28  
29  
30  
31  
32  
33  
34  
35  
36  
37  
38  
39  
40  
41  
42  
43  
44  
45  
46  
47  
48  
49  
50  
51  
52  
53  
54  
55  
56  
57  
58  
59  
60

Microcon Research Working Paper 24, Brighton, May 2010.

[http://www.microconflict.eu/publications/RWP24\\_CB\\_TB.pdf](http://www.microconflict.eu/publications/RWP24_CB_TB.pdf) (accessed 10 July 2014).

Formatted: Default Paragraph Font, Font color: Black

12. World Food Programme. *Food Security Assessment of IDP Camps in Gulu, Kitgum, and Pader Districts, October 2006-Final Report*—January 2007.

<http://documents.wfp.org/stellent/groups/public/documents/ana/wfp120444.pdf> (accessed 10 July 2014).

Formatted: Default Paragraph Font, Font color: Black

13. Raleigh C, Linke A, HåvardH, Karlson J. Introduced ACLED—Armed Conflict Location and Event Data. *J Peace Res* 2010;47:1-10. [www.acledata.com](http://www.acledata.com) (accessed 10 July 2014).

Formatted: Default Paragraph Font

14. Russo R. Uganda's IDP Camps Start to Close as Peace Takes Hold. September 11, 2007. <http://www.unhcr.org/46e6a06013.html> (accessed 10 July 2014).

Formatted: Default Paragraph Font, Font color: Black

15. Beas M, Hartley A. *Northern Uganda Internally Displaced Persons Profiling Study*. Vol 1. United Nations Development Programme, 2005.

[http://www.iafo.no/iafo/africa/uganda/IDP\\_uganda\\_2005.pdf](http://www.iafo.no/iafo/africa/uganda/IDP_uganda_2005.pdf) (accessed 10 July 2014).

Formatted: Default Paragraph Font, Font: Cambria, 12 pt

16. Spencer PS, Palmer VS, Jilek Aall L. Nodding syndrome: origins and natural history of a longstanding epileptic disorder in sub-Saharan Africa. *Afr Health Sci* 2013;13:176-82. 2013.

17. Uganda Ministry of Health. *Health and Mortality Survey Among Internally Displaced Persons in Gulu, Kitgum and Pader Districts, Northern Uganda*. World Health Organization, Geneva, July, 2005.

<http://www.who.int/hac/crises/uga/sitreps/Ugandamortsurvey.pdf> (accessed 10 July 2014).

18. United Nations. *An Account of Life in Northern Uganda*. oOCHA RSO-CEA and IRIN, 2004. [http://www.irinnews.org/pdf/in\\_depth/when\\_the\\_sun\\_sets\\_revised\\_edition.pdf](http://www.irinnews.org/pdf/in_depth/when_the_sun_sets_revised_edition.pdf) (accessed 10 July 2014).

Formatted: Default Paragraph Font, Font color: Black

1  
2  
3  
4  
5  
6  
7  
8  
9  
10  
11  
12  
13  
14  
15  
16  
17  
18  
19  
20  
21  
22  
23  
24  
25  
26  
27  
28  
29  
30  
31  
32  
33  
34  
35  
36  
37  
38  
39  
40  
41  
42  
43  
44  
45  
46  
47  
48  
49  
50  
51  
52  
53  
54  
55  
56  
57  
58  
59  
60

#### FIGURE LEGENDS

**Figure 1.**  
Kitgum District (*center*), northern Uganda, one of three districts heavily impacted by Nodding Syndrome

**Figure 2.**  
Temporal relationship between conflict events, fatalities ([number of deaths](#)) and approximate number of new [cases of MOH-reported cases of](#) Nodding Syndrome. Kitgum District, 1997-2011.

**Figure 3.**  
Temporal relationship between new [MOH-reported cases](#) of Nodding Syndrome relative to household relocation to IDP camps. Kitgum District, 2005 [[2148](#)].

1  
2  
3  
4  
5  
6  
7  
8  
9  
10  
11  
12  
13  
14  
15  
16  
17  
18  
19  
20  
21  
22  
23  
24  
25  
26  
27  
28  
29  
30  
31  
32  
33  
34  
35  
36  
37  
38  
39  
40  
41  
42  
43  
44  
45  
46  
47  
48  
49  
50  
51  
52  
53  
54  
55  
56  
57  
58  
59  
60

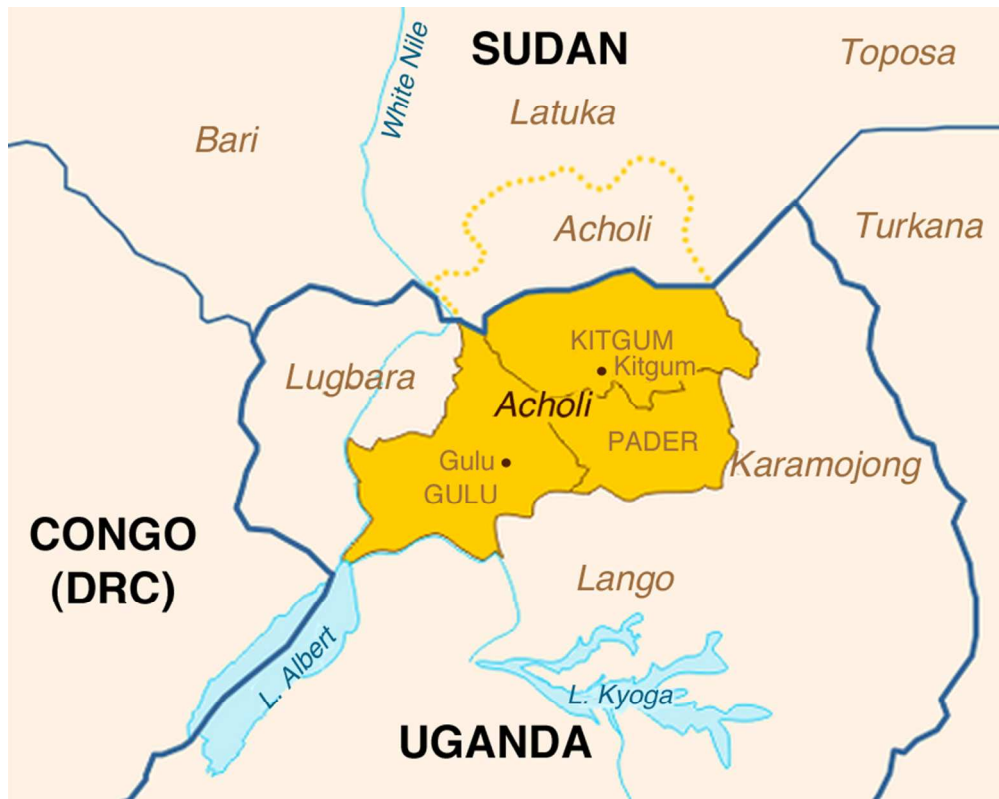

Kitgum District (center), northern Uganda, one of three districts heavily impacted by Nodding Syndrome.  
80x63mm (300 x 300 DPI)

ew only

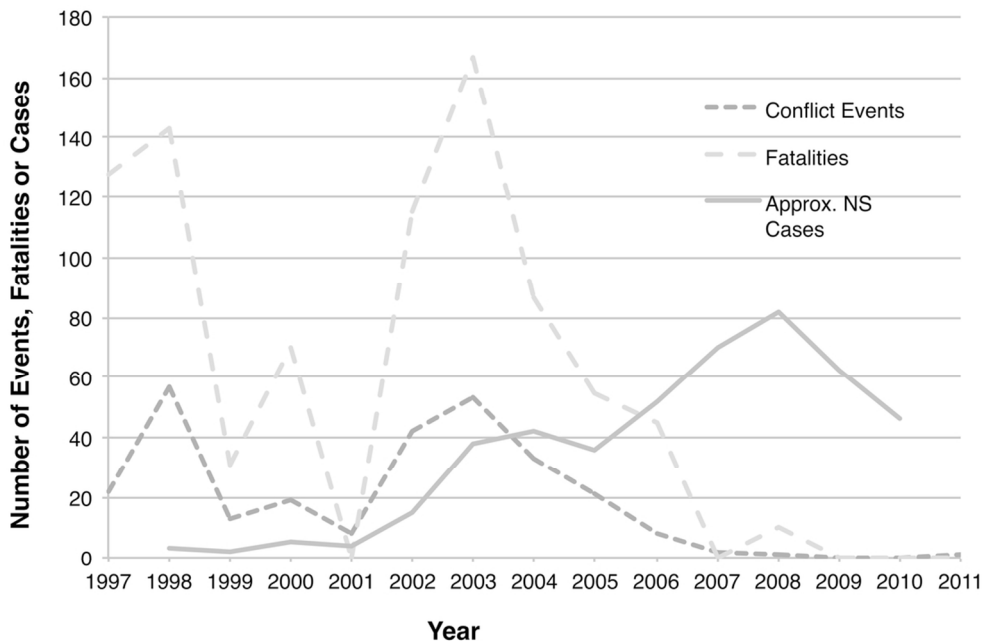

Temporal relationship between conflict events, fatalities (number of deaths) and approximate number of new MOH-reported cases of Nodding Syndrome. Kitgum District, 1997-2011.  
51x33mm (600 x 600 DPI)

Review only

1  
2  
3  
4  
5  
6  
7  
8  
9  
10  
11  
12  
13  
14  
15  
16  
17  
18  
19  
20  
21  
22  
23  
24  
25  
26  
27  
28  
29  
30  
31  
32  
33  
34  
35  
36  
37  
38  
39  
40  
41  
42  
43  
44  
45  
46  
47  
48  
49  
50  
51  
52  
53  
54  
55  
56  
57  
58  
59  
60

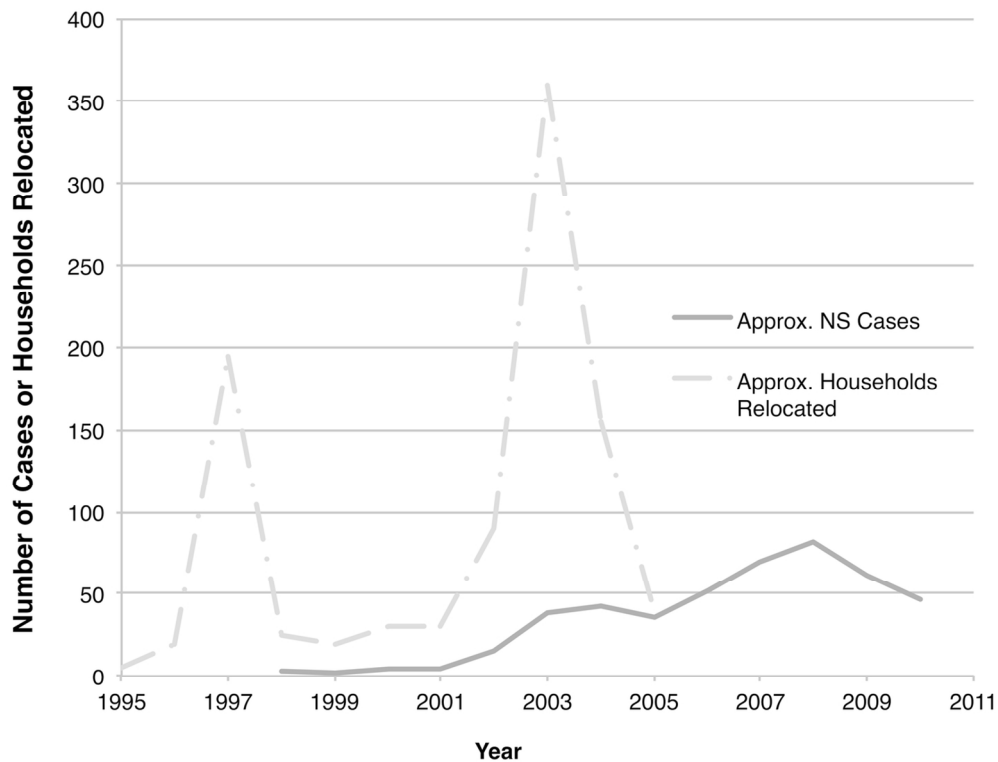

Temporal relationship between new MOH-reported cases of Nodding Syndrome relative to household relocation to IDP camps. Kitgum District, 2005 [21].  
61x47mm (600 x 600 DPI)

ew only
